# THE AMERICAN JOURNAL OF PSYCHIATRY

---

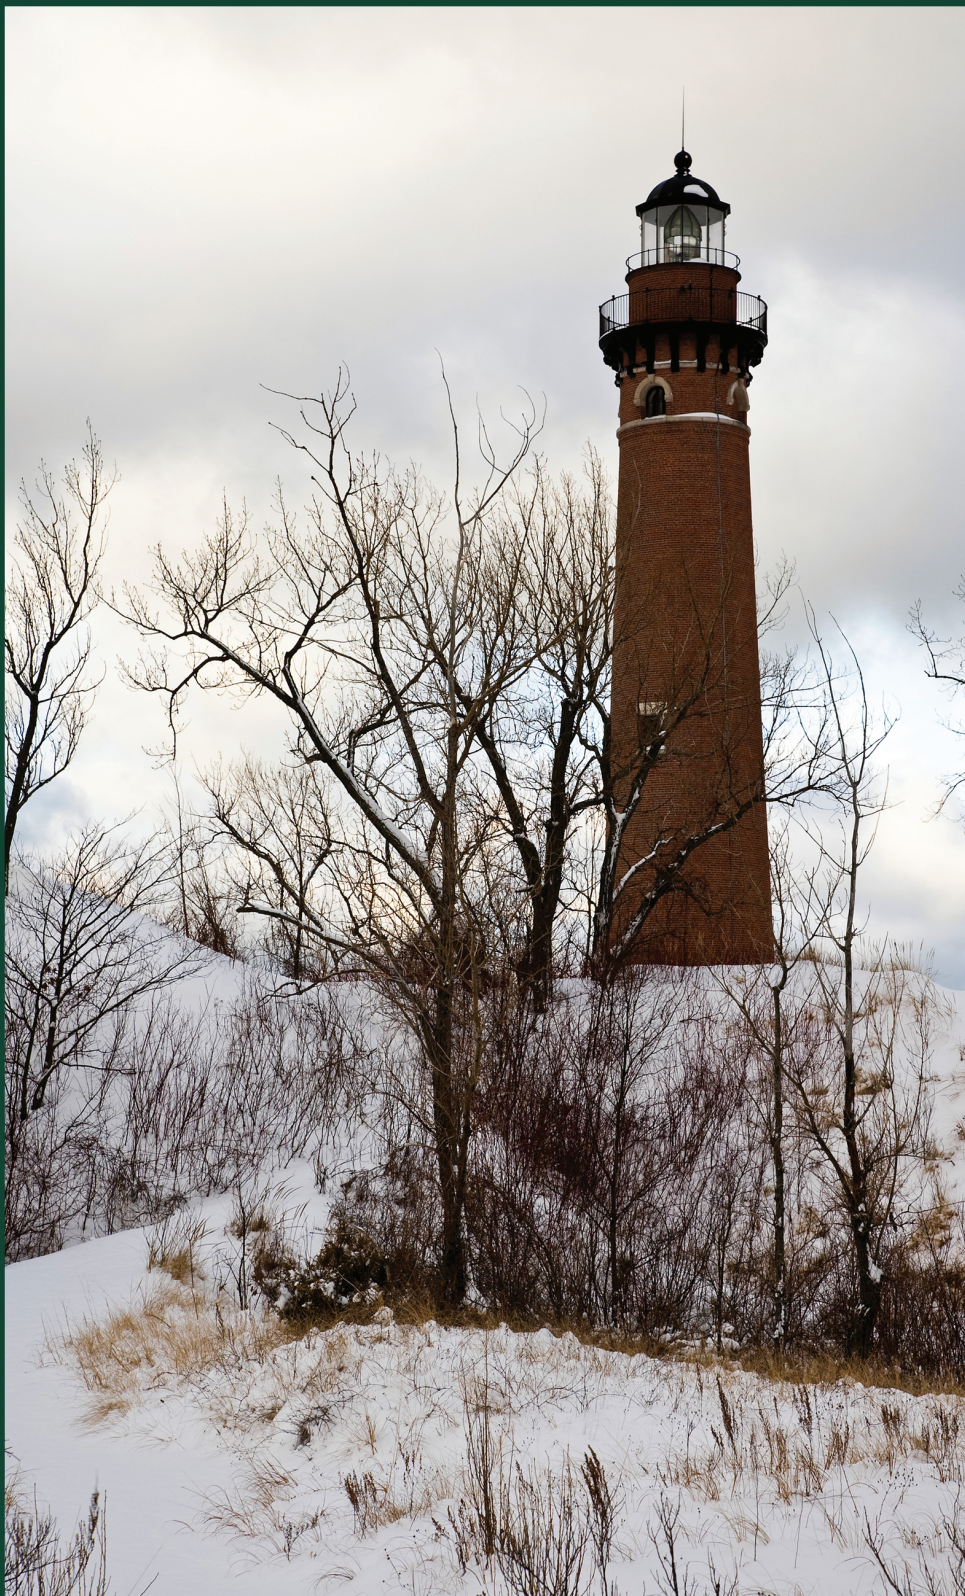

## 2012 in Review

Robert Freedman, M.D., et al. 1233

L-Methylfolate as Adjunctive  
Therapy for SSRI-Resistant Major  
Depression: Results of Two  
Randomized, Double-Blind,  
Parallel-Sequential Trials

George I. Papakostas, M.D., et al. 1267

Semantic Distance Abnormalities  
in Mild Cognitive Impairment:  
Their Nature and Relationship to  
Function

Brady C. Kirchberg, B.A., et al. 1275

White Matter Abnormalities in  
Veterans With Mild Traumatic  
Brain Injury

Ricardo E. Jorge, M.D., et al. 1284

Continuing Medical Education 1333

**December 2012**

**Volume 169 • Number 12**

---

Official Journal of the  
AMERICAN PSYCHIATRIC ASSOCIATION

---

[ajp.psychiatryonline.org](http://ajp.psychiatryonline.org)
