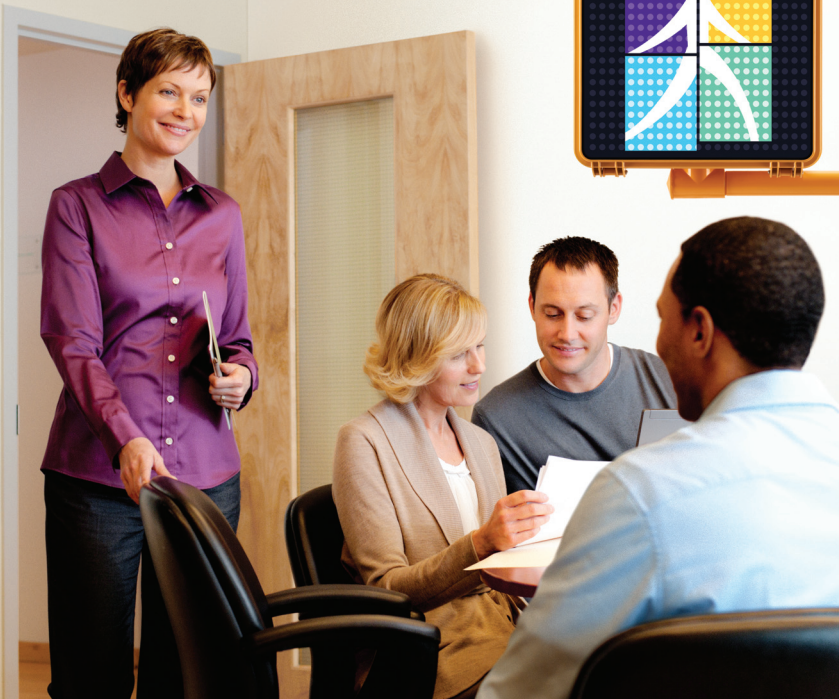

Help your adult patients  
with Major Depressive Disorder (MDD)  
toward their treatment goals

**GO**  
forward with  
**Pristiq**

**Results from PRISTIQ 50 mg clinical studies:**

- An SNRI with proven efficacy<sup>1</sup>
- Demonstrated improvement in functional outcomes—work, leisure, and home activities as measured by the Sheehan Disability Scale\* total score<sup>2</sup>
- Discontinuation rate due to adverse events comparable to placebo<sup>3</sup>
- No significant weight gain versus placebo and low incidence of sexual side effects<sup>3</sup>

The most commonly observed adverse reactions in patients taking PRISTIQ (incidence  $\geq 5\%$  and  $\geq 2x$  the rate of placebo) were nausea, dizziness, hyperhidrosis, constipation, and decreased appetite.

\*A validated, self-rated measure of functional impairment.<sup>4</sup>

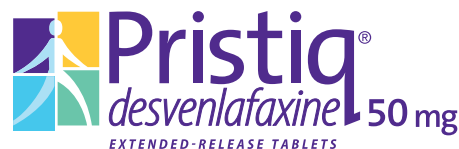

To learn more about PRISTIQ, go to [www.pristiqhcp.com](http://www.pristiqhcp.com)

PRISTIQ is indicated for the treatment of major depressive disorder in adults.

**Important Safety Information for PRISTIQ**

**WARNING: SUICIDALITY AND ANTIDEPRESSANT DRUGS**

Antidepressants increased the risk compared to placebo of suicidal thinking and behavior (suicidality) in children, adolescents, and young adults in short-term studies of Major Depressive Disorder (MDD) and other psychiatric disorders. Anyone considering the use of PRISTIQ or any other antidepressant in a child, adolescent, or young adult must balance this risk with the clinical need. Short-term studies did not show an increase in the risk of suicidality with antidepressants compared to placebo in adults beyond age 24; there was a reduction in risk with antidepressants compared to placebo in adults aged 65 and older. Depression and certain other psychiatric disorders are themselves associated with increases in the risk of suicide. Patients of all ages who are started on antidepressant therapy should be monitored appropriately and observed closely for clinical worsening, suicidality, or unusual changes in behavior. Families and caregivers should be advised of the need for close observation and communication with the prescriber. PRISTIQ is not approved for use in pediatric patients.

**Contraindications**

- PRISTIQ is contraindicated in patients with a known hypersensitivity to PRISTIQ or venlafaxine.
- PRISTIQ must not be used concomitantly with an MAOI or within 14 days of stopping an MAOI. Allow 7 days after stopping PRISTIQ before starting an MAOI.

**Warnings and Precautions**

- All patients treated with antidepressants should be monitored appropriately and observed closely for clinical worsening, suicidality, and unusual changes in behavior, especially during the first few months of treatment and when changing the dose. Consider changing the therapeutic regimen, including possibly discontinuing the medication, in patients whose depression is persistently worse or includes symptoms of anxiety, agitation, panic attacks, insomnia, irritability, hostility, aggressiveness, impulsivity, akathisia, hypomania, mania, or suicidality that are severe, abrupt in onset, or were not part of the patient's presenting symptoms. Families and caregivers of patients being treated with antidepressants should be alerted about the need to monitor patients.
- Development of a potentially life-threatening serotonin syndrome or Neuroleptic Malignant Syndrome-like reactions have been reported with SNRIs and SSRIs alone, including PRISTIQ treatment, but particularly with concomitant use of serotonergic drugs, including triptans, with drugs that impair the metabolism of serotonin (including MAOIs), or with antipsychotics or other dopamine antagonists. If concomitant use with a triptan is clinically warranted, careful observation of the patient is advised, particularly during treatment initiation and dose increases. Concomitant use of PRISTIQ with serotonin precursors is not recommended.
- Patients receiving PRISTIQ should have regular monitoring of blood pressure since increases in blood pressure were observed in clinical studies. Pre-existing hypertension should be controlled before starting PRISTIQ. Caution should be exercised in treating patients with pre-existing hypertension or other underlying conditions that might be compromised by increases in blood pressure. Cases of elevated blood pressure requiring immediate treatment have been reported. For patients who experience a sustained increase in blood pressure, either dose reduction or discontinuation should be considered.
- SSRIs and SNRIs, including PRISTIQ, may increase the risk of bleeding events. Concomitant use of aspirin, NSAIDs, warfarin, and other anticoagulants may add to this risk.

- Mydriasis has been reported in association with PRISTIQ; therefore, patients with raised intraocular pressure or those at risk of acute narrow-angle glaucoma (angle-closure glaucoma) should be monitored.
- PRISTIQ is not approved for use in bipolar depression. Prior to initiating treatment with an antidepressant, patients should be adequately screened to determine the risk of bipolar disorder.
- As with all antidepressants, PRISTIQ should be used cautiously in patients with a history or family history of mania or hypomania, or with a history of seizure disorder.
- Caution is advised in administering PRISTIQ to patients with cardiovascular, cerebrovascular, or lipid metabolism disorders. Increases in blood pressure and small increases in heart rate were observed in clinical studies with PRISTIQ. PRISTIQ has not been evaluated systematically in patients with a recent history of myocardial infarction, unstable heart disease, uncontrolled hypertension, or cerebrovascular disease.
- Dose-related elevations in fasting serum total cholesterol, LDL (low density lipoprotein) cholesterol, and triglycerides were observed in clinical studies. Measurement of serum lipids should be considered during PRISTIQ treatment.
- On discontinuation, adverse events, some of which may be serious, have been reported with PRISTIQ and other SSRIs and SNRIs. Abrupt discontinuation of PRISTIQ has been associated with the appearance of new symptoms. Patients should be monitored for symptoms when discontinuing treatment. A gradual reduction in dose rather than abrupt cessation is recommended whenever possible.
- The recommended dose in patients with severe renal impairment or end-stage renal disease (ESRD) is 50 mg every other day. The dose should not be escalated in patients with moderate or severe renal impairment or ESRD.
- Products containing desvenlafaxine and products containing venlafaxine should not be used concomitantly with PRISTIQ.
- Hyponatremia may occur as a result of treatment with SSRIs and SNRIs, including PRISTIQ. Discontinuation of PRISTIQ should be considered in patients with symptomatic hyponatremia.
- Interstitial lung disease and eosinophilic pneumonia associated with venlafaxine (the parent drug of PRISTIQ) therapy have been rarely reported.

**Adverse Reactions**

- The most commonly observed adverse reactions in patients taking PRISTIQ vs placebo for MDD in short-term fixed-dose premarketing studies (incidence  $\geq 5\%$  and  $\geq 2x$  the rate of placebo in the 50-mg dose group) were nausea (22% vs 10%), dizziness (13% vs 5%), hyperhidrosis (10% vs 4%), constipation (9% vs 4%), and decreased appetite (5% vs 2%).

**References:** 1. Thase ME, Kornstein SG, Germain JM, Jiang Q, Guico-Pabia C, Ninan PT. An integrated analysis of the efficacy of desvenlafaxine compared with placebo in patients with major depressive disorder. *CNS Spectr*. 2009;14(3):144-154. 2. Soares CN, Kornstein SG, Thase ME, Jiang Q, Guico-Pabia CJ. Assessing the efficacy of desvenlafaxine for improving functioning and well-being outcome measures in patients with major depressive disorder: a pooled analysis of 9 double-blind, placebo-controlled, 8-week clinical trials. *J Clin Psychiatry*. 2009;70(10):1365-1371. 3. Clayton AH, Kornstein SG, Rosas G, Guico-Pabia C, Tourian KA. An integrated analysis of the safety and tolerability of desvenlafaxine compared with placebo in the treatment of major depressive disorder. *CNS Spectr*. 2009;14(4):183-195. 4. Leon AC, Offman M, Portera L, Farber L, Sheehan DV. Assessing psychiatric impairment in primary care with the Sheehan Disability Scale. *Int J Psychiatry Med*. 1997;27:93-105.

Please see brief summary of Prescribing Information on adjacent pages.

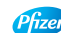



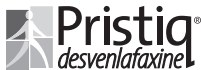

Extended-Release Tablets

**BRIEF SUMMARY.** See package insert for full Prescribing Information. For further product information and current package insert, please visit [www.wyeth.com](http://www.wyeth.com) or call our medical communications department toll-free at 1-800-934-5556.

**WARNING: Suicidality and Antidepressant Drugs**

Antidepressants increased the risk compared to placebo of suicidal thinking and behavior (suicidality) in children, adolescents, and young adults in short-term studies of Major Depressive Disorder (MDD) and other psychiatric disorders. Anyone considering the use of Pristiq or any other antidepressant in a child, adolescent, or young adult must balance this risk with the clinical need. Short-term studies did not show an increase in the risk of suicidality with antidepressants compared to placebo in adults beyond age 24; there was a reduction in risk with antidepressants compared to placebo in adults aged 65 and older. Depression and certain other psychiatric disorders are themselves associated with increases in the risk of suicide. Patients of all ages who are started on antidepressant therapy should be monitored appropriately and observed closely for clinical worsening, suicidality, or unusual changes in behavior. Families and caregivers should be advised of the need for close observation and communication with the prescriber. Pristiq is not approved for use in pediatric patients [see *Warnings and Precautions (5.1), Use in Specific Populations (8.4), and Patient Counseling Information (17.1 in the full prescribing information)*].

**INDICATIONS AND USAGE:** Pristiq, a selective serotonin and norepinephrine reuptake inhibitor (SNRI), is indicated for the treatment of major depressive disorder (MDD).

**CONTRAINDICATIONS: Hypersensitivity**-Hypersensitivity to desvenlafaxine succinate, venlafaxine hydrochloride or to any excipients in the Pristiq formulation. **Monoamine Oxidase Inhibitors**-Pristiq must not be used concomitantly in patients taking monoamine oxidase inhibitors (MAOIs) or in patients who have taken MAOIs within the preceding 14 days due to the risk of serious, sometimes fatal, drug interactions with SNRI or SSRI treatment or with other serotonergic drugs. Based on the half-life of desvenlafaxine, at least 7 days should be allowed after stopping Pristiq before starting an MAOI [see *Dosage and Administration (2.6 in the full prescribing information)*].

**WARNINGS AND PRECAUTIONS: Clinical Worsening and Suicide Risk**-Patients with major depressive disorder (MDD), both adult and pediatric, may experience worsening of their depression and/or the emergence of suicidal ideation and behavior (suicidality) or unusual changes in behavior, whether or not they are taking antidepressant medications, and this risk may persist until significant remission occurs. Suicide is a known risk of depression and certain other psychiatric disorders, and these disorders themselves are the strongest predictors of suicide. There has been a long-standing concern, however, that antidepressants may have a role in inducing worsening of depression and the emergence of suicidality in certain patients during the early phases of treatment. Pooled analyses of short-term placebo-controlled studies of antidepressant drugs (SSRIs and others) showed that these drugs increase the risk of suicidal thinking and behavior (suicidality) in children, adolescents, and young adults (ages 18-24) with major depressive disorder (MDD) and other psychiatric disorders. Short-term studies did not show an increase in the risk of suicidality with antidepressants compared to placebo in adults beyond age 24; there was a reduction with antidepressants compared to placebo in adults aged 65 and older. The pooled analyses of placebo-controlled studies in children and adolescents with MDD, obsessive-compulsive disorder (OCD), or other psychiatric disorders included a total of 24 short-term studies of 9 antidepressant drugs in over 4,400 patients. The pooled analyses of placebo-controlled studies in adults with MDD or other psychiatric disorders included a total of 295 short-term studies (median duration of 2 months) of 11 antidepressant drugs in over 77,000 patients. There was considerable variation in risk of suicidality among drugs, but a tendency toward an increase in the younger patients for almost all drugs studied. There were differences in absolute risk of suicidality across the different indications, with the highest incidence in MDD. The risk differences (drug vs. placebo), however, were relatively stable within age strata and across indications. These risk differences (drug-placebo difference in the number of cases of suicidality per 1000 patients treated) are provided in Table 1 of the full prescribing information. No suicides occurred in any of the pediatric studies. There were suicides in the adult studies, but the number was not sufficient to reach any conclusion about drug effect on suicide. It is unknown whether the suicidality risk extends to longer-term use, ie, beyond several months. However, there is substantial evidence from placebo-controlled maintenance studies in adults with depression that the use of antidepressants can delay the recurrence of depression. **All patients being treated with antidepressants for any indication should be monitored appropriately and observed closely for clinical worsening, suicidality, and unusual changes in behavior, especially during the initial few months of a course of drug therapy, or at times of dose changes, either increases or decreases.** The following symptoms, anxiety, agitation, panic attacks, insomnia, irritability, hostility, aggressiveness, impulsivity, akathisia (psychomotor restlessness), hypomania, and mania, have been reported in adult and pediatric patients being treated with antidepressants for major depressive disorder as well as for other indications, both psychiatric and nonpsychiatric. Although a causal link between the emergence of such symptoms and either the worsening of depression and/or the emergence of suicidal impulses has not been established, there is concern that such symptoms may represent precursors to emerging suicidality. Consideration should be given to changing the therapeutic regimen, including possibly discontinuing the medication, in patients whose depression is persistently worse, or who are experiencing emergent suicidality or symptoms that might be precursors to worsening depression or suicidality, especially if these symptoms are severe, abrupt in onset, or were not part of the patient's presenting symptoms. If the decision has been made to discontinue treatment, medication should be tapered, as rapidly as is feasible, but with recognition that abrupt discontinuation can be associated with certain symptoms [see *Warnings and Precautions (5.9) and Dosage and Administration (2.3 in the full prescribing information for a description of the risks of discontinuation of Pristiq)*]. **Families and caregivers of patients being treated with antidepressants for major depressive disorder or other indications, both psychiatric and nonpsychiatric, should be alerted about the need to monitor patients for the emergence of agitation, irritability, unusual changes in behavior, and the other symptoms described above, as well as the emergence of suicidality, and to report such symptoms immediately to health care providers. Such monitoring should include daily observation by families and caregivers.** Prescriptions for Pristiq should be written for the smallest quantity of tablets consistent with good patient management, in order to reduce the risk of overdose. **Screening patients for bipolar disorder**-A major depressive episode may be the initial presentation of bipolar disorder. It is generally believed (though not established in controlled studies) that treating such an episode with an antidepressant alone may increase the likelihood of precipitation of a mixed/manic episode in patients at risk for bipolar disorder. Whether any of the symptoms described above represent such a conversion is unknown. However, prior to initiating treatment with an antidepressant, patients with depressive symptoms should be adequately screened to determine if they are at risk for bipolar disorder; such screening should include a detailed psychiatric history, including a family history of suicide, bipolar disorder, and depression. It should be noted that Pristiq is not approved for use in treating bipolar depression. **Serotonin Syndrome or Neuroleptic Malignant Syndrome (NMS)-like Reactions:** The development of a potentially life-threatening serotonin syndrome or Neuroleptic Malignant Syndrome (NMS)-like reactions have been reported with SNRIs and SSRIs alone, including Pristiq treatment, but particularly with concomitant use of serotonergic drugs (including triptans), with drugs that impair metabolism of serotonin (including MAOIs), or with antipsychotics or other dopamine antagonists. Serotonin syndrome symptoms may include mental status changes (eg, agitation, hallucinations, coma), autonomic instability (eg, tachycardia, labile blood pressure, hyperthermia), neuromuscular aberrations (eg, hyperreflexia, incoordination) and/or gastrointestinal symptoms (eg, nausea, vomiting, diarrhea). Serotonin syndrome in its most severe form can resemble neuroleptic malignant syndrome, which includes hyperthermia, muscle rigidity, autonomic instability with possible rapid fluctuation of vital signs, and mental status changes. Patients should be monitored for the emergence of serotonin syndrome or NMS-like signs and symptoms. The concomitant use of Pristiq with MAOIs intended to treat depression is contraindicated [see *Contraindications (4.2)*]. If concomitant treatment of Pristiq with a 5-hydroxytryptamine receptor agonist (triptan) is clinically warranted, careful observation of the patient is advised, particularly during treatment initiation and dose increases. The concomitant use of Pristiq with serotonin precursors (such as tryptophan) is not recommended. Treatment with Pristiq and any concomitant serotonergic or antidepressant agents, including antipsychotics, should be discontinued immediately if the above events occur, and supportive symptomatic treatment should be initiated. **Elevated Blood Pressure**-Patients receiving Pristiq should have regular monitoring of blood pressure since dose-dependent increases were observed in clinical studies. Pre-existing hypertension should be controlled before initiating treatment with Pristiq. Caution should be exercised in treating patients with pre-existing hypertension or other underlying conditions that might be compromised by increases in blood pressure. Cases of elevated blood pressure requiring immediate treatment have been reported with Pristiq. **Sustained hypertension**-Sustained blood pressure increases could have adverse consequences. For patients who experience a sustained increase in blood pressure while receiving Pristiq, either dose reduction or discontinuation should be considered [see *Adverse Reactions (6.1)*]. Treatment with Pristiq in controlled studies was associated with sustained hypertension, defined as treatment-emergent supine diastolic blood pressure (SDBP)  $\geq 90$  mm Hg and  $\geq 10$  mm Hg above baseline for 3 consecutive on-therapy visits. In clinical studies, regarding the proportion of patients with sustained hypertension, the following rates were observed: placebo (0.5%), Pristiq 50 mg (1.3%), Pristiq 100 mg (0.7%), Pristiq 200 mg (1.1%), and Pristiq 400 mg (2.3%). Analyses of patients in Pristiq controlled studies who met criteria for sustained hypertension revealed a

## Subscription and Business Information

The American Journal of Psychiatry, ISSN 0002-953X, is published monthly by the American Psychiatric Association, 1000 Wilson Blvd., Suite 1825, Arlington, VA 22209-3901. Subscriptions (per year): individual \$244.00, international \$368.00. For additional subscription options, including single issues and student rates, please contact Customer Service at 1-800-368-5777 or email [appi@psych.org](mailto:appi@psych.org). Institutional subscriptions are tier priced. For institutional site license or pricing information, contact 703-907-8538 or email [institutions@psych.org](mailto:institutions@psych.org).

Business communications, address changes, and subscription questions from APA members should be directed to the Division of Member Services: (888) 35-PSYCH (tollfree). Non-member subscribers should call the Circulation Department: (800) 368-5777. Author inquiries should be directed to the Journal editorial office: (703) 907-7885 or (703) 907-7889; fax (703) 907-1096; e-mail [ajp@psych.org](mailto:ajp@psych.org).

Business Management: Lindsey Fox, Advertising Manager; Andrew Wilson, Director, Production; Robert Pursell, Associate Publisher Advertising, Sales and Marketing.

Pharmaceutical Print and Online Advertising: Frank Cox, Kathleen Harrison, Valentin Torres, Pharmaceutical Media, Inc. 30 East 33rd Street, New York, NY 10016. (212) 685-5010; fax (212) 685-6126; e-mail [vtorres@pminy.com](mailto:vtorres@pminy.com).

Nonpharmaceutical and Online Sales: Eamon Woods, Pharmaceutical Media, Inc. (see address, phone, and fax above).

Pages are produced using Adobe InDesign CS4. Printed by Dartmouth Journal Services, Waterbury, VT, on acid-free paper effective with Volume 169, Number 1, January 2012.

Periodicals postage paid at Arlington, VA, and additional mailing offices. POSTMASTER: Send address changes to The American Journal of Psychiatry, Circulation Department, American Psychiatric Association, 1000 Wilson Blvd., Suite 1825, Arlington, VA 22209-3901.

Indexed in Abstracts for Social Workers, Academic Abstracts, Biological Abstracts, Chemical Abstracts, Chicago Psychoanalytic Literature Index, Cumulative Index to Nursing Literature, Excerpta Medica, Hospital Literature Index, Index Medicus, International Nursing Index, Nutrition Abstracts, Psychological Abstracts, Science Citation Index, Social Science Source, and Social Sciences Index.

The American Psychiatric Association does not hold itself responsible for statements made in its publications by contributors or advertisers. Unless so stated, material in The American Journal of Psychiatry does not reflect the endorsement, official attitude, or position of the American Psychiatric Association or of the Journal's Editorial Board.

Material published in the journals of the American Psychiatric Association and American Psychiatric Publishing is protected by copyright and all rights are reserved. Material may not be reproduced in any form or by any means without written permission from the copyright owner. For permission to reproduce material published by the American Psychiatric Association, please visit <http://www.appi.org/CustomerService/Pages/Permissions.aspx> for more information. Permission can also be secured through the Copyright Clearance Center ([www.copyright.com](http://www.copyright.com)). For bulk reprints, please contact Cecilia Stoute at 703-907-8547; e-mail: [cstoute@psych.org](mailto:cstoute@psych.org).

This consent does not extend to other kinds of copying, such as copying for general distribution, for advertising or promotional purposes, for creating new collective works, or for resale. Requests for commercial distribution should be directed to (703) 907-7875. APA does not require that permission be obtained for the photocopying of isolated articles for nonprofit classroom or library reserve use; all fees associated with such permission are waived.

Copyright © 2012 American Psychiatric Association.

# THE AMERICAN JOURNAL OF PSYCHIATRY

## EDITOR-IN-CHIEF

Robert Freedman, M.D.

## DEPUTY EDITORS

David A. Lewis, M.D.

Robert Michels, M.D.

Daniel S. Pine, M.D.

Susan K. Schultz, M.D.

Carol A. Tamminga, M.D.

## EDITORIAL STAFF

### Executive Editor

Michael D. Roy

### Senior Editor/Features Writer

Jane Weaver, E.L.S.

### Senior Editor

John J. Guardiano, Ph.D.

### Production Manager

Susan Westrate

### Assistant Editors

Katie Duffy

Angela Moore

### Editorial Support Services

#### Manager

Nicole Gray

### Editorial Assistant

Linda LaCour

### Editorial Assistant/ Permissions Coordinator

Heidi Koch

### Assistants to the Editors

Lois Lilienthal

Laura English

Rachel Hogg

Russell A. Scholl

## ASSOCIATE EDITORS

Kathleen T. Brady, M.D., Ph.D.

David A. Brent, M.D.

Linda Brzustowicz, M.D.

Cameron S. Carter, M.D.

Steven Hamilton, M.D., Ph.D.

Daniel C. Javitt, M.D.

Bankole Johnson, M.D.

Ellen Leibenluft, M.D.

Douglas F. Levinson, M.D.

Jeffrey A. Lieberman, M.D.

Barbara Milrod, M.D.

Maria A. Oquendo, M.D.

Jerrold F. Rosenbaum, M.D.

A. John Rush, M.D.

Larry J. Siever, M.D.

Patricia Suppes, M.D., Ph.D.

## EDITOR EMERITA

Nancy C. Andreasen, M.D., Ph.D.

## FORMER EDITORS

Amariah Brigham, M.D.

1844-1849

T. Romeyn Beck, M.D.

1849-1854

John P. Gray, M.D.

1854-1886

G. Alder Blumer, M.D.

1886-1894

Richard Dewey, M.D.

1894-1897

Henry M. Hurd, M.D.

1897-1904

Edward N. Brush, M.D.

1904-1931

Clarence B. Farrar, M.D.

1931-1965

Francis J. Braceland, M.D.

1965-1978

John C. Nemiah, M.D.

1978-1993

**THERE ARE GOOD REASONS  
AMERICAN  
PROFESSIONAL  
AGENCY  
IS A LEADER IN PROVIDING  
MALPRACTICE INSURANCE  
FOR PSYCHIATRISTS  
HERE ARE TWO OF THEM.**

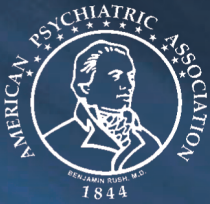

[www.psychiatry.org](http://www.psychiatry.org)

**AMERICAN ACADEMY OF  
CHILD & ADOLESCENT  
PSYCHIATRY**

[WWW.AACAP.ORG](http://WWW.AACAP.ORG)

JOIN YOUR COLLEAGUES WHO HAVE CHOSEN TO BE REPRESENTED BY OUR PROFESSIONAL TEAM AND OUR PROGRAM WHICH IS ENDORSED BY THE TWO MOST PROMINENT ASSOCIATIONS IN YOUR PROFESSION – THE AMERICAN PSYCHIATRIC ASSOCIATION AND THE AMERICAN ACADEMY OF CHILD AND ADOLESCENT PSYCHIATRY.

AS AN ALLIED WORLD POLICYHOLDER YOU WILL BENEFIT FROM THE EXPERIENCE OF AN INTERNATIONALLY RECOGNIZED RISK MANAGEMENT TEAM WHO WILL GUIDE YOU THROUGH THE EVER-CHANGING EXPOSURES THAT YOU MAY ENCOUNTER IN YOUR PSYCHIATRIC PRACTICE. OUR RISK MANAGEMENT TEAM IS AVAILABLE TO OUR INSUREDS 24 HOURS A DAY, SEVEN DAYS A WEEK OR THROUGH OUR HOTLINE.

**WHEN IT COMES TO MALPRACTICE INSURANCE  
FOR PSYCHIATRISTS,  
GO WITH A WORLDWIDE LEADER**

COVERAGE WILL BE UNDERWRITTEN BY AN INSURANCE SUBSIDIARY OF ALLIED  
WORLD ASSURANCE COMPANY HOLDINGS, AG

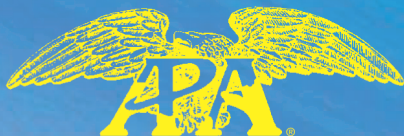

95 Broadway, Amityville, NY 11701

[WWW.APAMALPRACTICE.COM](http://WWW.APAMALPRACTICE.COM)  
877-740-1777

# THE AMERICAN JOURNAL OF PSYCHIATRY

## In This Issue

A24

### Perspectives

#### Editorials

- 1223 The Evolving Story of Folate in Depression and the Therapeutic Potential of L-Methylfolate**  
J. Craig Nelson **Audio**
- 1226 Loss of Semantic Knowledge in Mild Cognitive Impairment**  
David P. Salmon
- 1230 Diffusion Tensor Imaging and Mild Traumatic Brain Injury in Soldiers: Abnormal Findings, Uncertain Implications**  
Jonathan M. Silver
- 1233 2012 in Review**  
Robert Freedman, David A. Lewis, Robert Michels, Daniel S. Pine, Susan K. Schultz, Carol A. Tamminga, Monifa Seawell **Audio**

#### Treatment in Psychiatry

- 1238 ECT in Treatment-Resistant Depression**  
Charles H. Kellner, Robert M. Greenberg, James W. Murrrough, Ethan O. Bryson, Mimi C. Briggs, and Rosa M. Pasculli  
**Audio Clinical Guidance CME**

#### Images in Psychiatry

- 1245 Revealing the Mind's Eye: Bringing (Mental) Images Into Psychiatry**  
Martina Di Simplicio, Josephine E. McInerney, Guy M. Goodwin, Mary-Jane Attenburrow, and Emily A. Holmes

#### Reviews and Overviews

- 1247 The Nature of the Association Between Childhood ADHD and the Development of Bipolar Disorder: A Review of Prospective High-Risk Studies**  
Anne Duffy **CME**
- 1256 Examining the Comorbidity Between Attention Deficit Hyperactivity Disorder and Bipolar I Disorder: A Meta-Analysis of Family Genetic Studies**  
Stephen V. Faraone, Joseph Biederman, and Janet Wozniak **Audio**

## New Research

### Articles

- 1267 L-Methylfolate as Adjunctive Therapy for SSRI-Resistant Major Depression: Results of Two Randomized, Double-Blind, Parallel-Sequential Trials**  
George I. Papakostas, Richard C. Shelton, John M. Zajecka, Bijan Etamad, Karl Rickels, Alisabet Clain, Lee Baer, Elizabeth D. Dalton, Garret R. Sacco, David Schoenfeld, Michael Pencina, Allison Meisner, Teodoro Bottiglieri, Erik Nelson, David Mischoulon, Jonathan E. Alpert, James G. Barbee, Sidney Zisook, and Maurizio Fava  
**Audio Clinical Guidance Editorial**
- 1275 Semantic Distance Abnormalities in Mild Cognitive Impairment: Their Nature and Relationship to Function**  
Brady C. Kirchberg, Jessica R. Cohen, Margarita B. Adelsky, Justin J. Buthorn, Jesus J. Gomar, Marc Gordon, Jeremy Koppel, Erica Christen, Concepcion Conejero-Goldberg, Peter Davies, and Terry E. Goldberg **Editorial**
- 1284 White Matter Abnormalities in Veterans With Mild Traumatic Brain Injury**  
Ricardo E. Jorge, Laura Acion, Tonya White, Diana Tordesillas-Gutierrez, Ronald Pierson, Benedicto Crespo-Facorro, and Vincent A. Magnotta **Audio CME Editorial**
- 1292 Up-Regulation of NOTCH4 Gene Expression in Bipolar Disorder**  
Ingrid Dieset, Srdjan Djurovic, Martin Tesli, Sigrun Hope, Morten Mattingsdal, Annika Michelsen, Inge Joa, Tor Ketil Larsen, Ingrid Agartz, Ingrid Melle, Jan Ivar Røssberg, Pål Aukrust, Ole A. Andreassen, and Thor Ueland
- 1301 Evidence That Schizophrenia Risk Variation in the ZNF804A Gene Exerts Its Effects During Fetal Brain Development**  
Matthew J. Hill and Nicholas J. Bray
- 1309 Genome-Wide Association Study of Clinical Dimensions of Schizophrenia: Polygenic Effect on Disorganized Symptoms**  
Ayman H. Fanous, Baiyu Zhou, Steven H. Aggen, Sarah E. Bergen, Richard L. Amdur, Jubao Duan, Alan R. Sanders, Jianxin Shi, Bryan J. Mowry, Ann Olincy, Farooq Amin, C. Robert Cloninger, Jeremy M. Silverman, Nancy G. Buccola, William F. Byerley, Donald W. Black, Robert Freedman, Frank Dudbridge, Peter A. Holmans, Schizophrenia Psychiatric Genome-Wide Association Study (GWAS) Consortium, Stephan Ripke, Pablo V. Gejman, Kenneth S. Kendler, and Douglas F. Levinson

## Communications and Updates

### Letters to the Editor

- 1318** Genetic Variation in KCNH2 and a Unique hERG Isoform in Patients With Schizophrenia: Efficacy-Safety Link  
Unplanned Pregnancies in Adolescents With Bipolar Disorder  
Monoamine Oxidase Inhibitors Potentiate the Effects of Deep Brain Stimulation

### 1321 Corrections

### Book Forum

- 1322** Hidden in the Shadow of the Master: the Model-Wives of Cézanne, Monet, and Rodin  
The Black Book  
Bring Up the Bodies  
Oblivion: A Memoir of Hector Abad

### 1326 Books Received

### Other Items of Interest

- 1327** Thank you to Reviewers  
**1333** Continuing Medical Education  
**A8** Officers of the American Psychiatric Association  
**A17** Calendar  
**A25** *British Journal of Psychiatry* Contents

### Cover

In this issue, the Journal Editors select those articles published in 2012 that shone brightest in guiding the field (p. 1233). Photo of Little Sable Point Light Station, a 107-foot tower built in 1874 located in Silver Lake State Park on the eastern shore of Lake Michigan. Photo from Dreamstime.com.

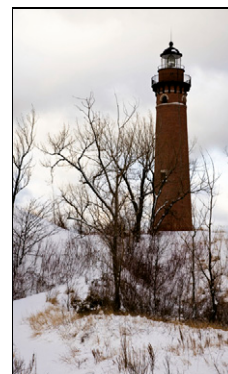

### Audio

this article is featured in *AJP Audio*: a downloadable .mp3 file available at [ajp.psychiatryonline.com](http://ajp.psychiatryonline.com)

### Clinical Guidance

this article offers clinical guidance (see "In this Issue" page or end of article)

### CME

a course covering the content of this article is available online for paid subscribers to the AJP CME Course Program

### Editorial

this article is discussed in one of the issue's editorials

This issue's Table of Contents is available in Spanish.  
Presented in collaboration with the Office of Global Health,  
UMDNJ-Robert Wood Johnson Medical School  
Translation courtesy of  
Sergi Casals, M.S.  
*Garuna Editors (www.garunaeditors.com), Barcelona, Spain*  
Carlos Lopez Jaramillo, M.D.  
*Universidad de Antioquia, Medellin, Colombia*  
and  
Javier I. Escobar, M.D., M.Sc.  
*UMDNJ-Robert Wood Johnson Medical School*  
Consulte *The American Journal of Psychiatry* en línea en  
[ajp.psychiatryonline.org](http://ajp.psychiatryonline.org)

# PSYCHIATRY

## BOARD REVIEW SERIES

### THE KAUFMAN COURSES

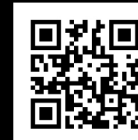

SPONSORED BY MONTEFIORE MEDICAL CENTER CREDIT DESIGNATED BY ALBERT EINSTEIN COLLEGE OF MEDICINE  
Accreditation Statement: Albert Einstein College of Medicine is accredited by the  
Accreditation Council for Continuing Medical Education (ACCME) to provide continuing medical education for physicians.

#### OFFERING CERTIFICATION COURSES ONLY

##### CLINICAL NEUROLOGY FOR PSYCHIATRISTS

**David Myland Kaufman, MD**

This intensive three-day weekend course, offered for the 41st year, is designed for psychiatrists in practice and in residency as an update and board preparation. Focusing on essential topics, the course uses lectures, an extensive syllabus, and the new edition of the textbook entitled *Clinical Neurology for Psychiatrists*, David M. Kaufman (7th edition).

AMA Statement: Albert Einstein College of Medicine designates this live activity for a maximum of 25 AMA PRA Category 1 Credit(s)<sup>TM</sup>. Physicians should claim only the credit commensurate with the extent of their participation in the activity.

##### NEW YORK

SUNY College of Optometry  
33 West 42nd Street  
(Between 5th and 6th Avenues)  
New York, NY 10036  
June 19 – 21, 2013

##### LOS ANGELES

The Westin Hotel at the Los Angeles Airport  
5400 West Century Boulevard  
Los Angeles, CA 90045  
July 19 – 21, 2013

##### PSYCHIATRY FOR PSYCHIATRISTS

**Andrea J. Weiss, MD and David Myland Kaufman, MD**

The Pre-test prepares attendees for the newly formatted psychiatry Certification exam utilizing a question and answer format to actively engage the learner and comprehensively review topics in psychiatry most relevant to that revised exam, as well as provide a clinical review an update for psychiatrists currently in practice. The course has been strategically updated to include audio, visual and written vignettes designed to familiarize participants with the new Part C section of the Certification Exam. This vigorous course complements standard psychiatry review courses and completes the review in *Clinical Neurology for Psychiatrists*. A small group of faculty who are experienced and well-informed about modern psychiatry and test-taking strategies will present essential information through a series of test-type questions, using an anonymous audience response system.

AMA Statement: Albert Einstein College of Medicine designates this live activity for a maximum of 16 AMA PRA Category 1 Credit(s)<sup>TM</sup>. Physicians should claim only the credit commensurate with the extent of their participation in the activity.

##### NEW YORK

SUNY College of Optometry  
33 West 42nd Street  
(Between 5th and 6th Avenues)  
New York, NY 10036  
June 22 – 23, 2013

##### LOS ANGELES

The Westin Hotel at the Los Angeles Airport  
5400 West Century Boulevard  
Los Angeles, CA 90045  
July 22 – 23, 2013

#### MAINTENANCE OF CERTIFICATION COURSE

##### THE PSYCHIATRY RECERT COURSE

**Andrea J. Weiss, MD and David Myland Kaufman, MD**

This intensive two-day course designed for psychiatrists reviews the psychiatric information likely to appear on the recertification examination. It will cover current evidence-based treatments for psychiatric disorders, emphasizing clinical matters and advances in diagnosis and treatment. Presentation of the material will be in a mixed format, with both lecture and question-and-answer utilizing audience response system keypads.

AMA Statement: Albert Einstein College of Medicine designates this live activity for a maximum of 16 AMA PRA Category 1 Credit(s)<sup>TM</sup>. Physicians should claim only the credit commensurate with the extent of their participation in the activity.

##### NEW YORK

SUNY College of Optometry  
Joseph and Roberta Schwarz Theater  
33 West 42nd Street  
(Between 5th and 6th Avenues)  
New York, NY 10036  
Friday, January 11 to Saturday, January 12, 2013  
7:30 AM – 6:00 PM

#### FOR MORE INFORMATION

- Web site Course Information or To Register: [www.cnfp.org](http://www.cnfp.org)
- Write: CCME, 3301 Bainbridge Avenue, Bronx, NY 10467
- [www.abpn.com](http://www.abpn.com) to view application deadlines

- E-mail: [cme@montefiore.org](mailto:cme@montefiore.org)
- Call: 718-920-6674 • Fax: 718-798-2336



# THE AMERICAN PSYCHIATRIC ASSOCIATION

1000 Wilson Blvd., Suite 1825, Arlington, VA 22209-3901  
(888) 357-7924 (toll-free inside the U.S. and Canada) / (703) 907-7300  
web site: [www.psych.org/](http://www.psych.org/) e-mail: [apa@psych.org](mailto:apa@psych.org)

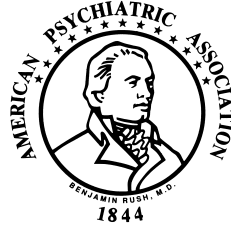

## OFFICERS 2012–2013

|                 |                            |
|-----------------|----------------------------|
| President       | Dilip V. Jeste, M.D.       |
| President-Elect | Jeffrey A. Lieberman, M.D. |
| Treasurer       | David Fassler, M.D.        |
| Secretary       | Roger Peele, M.D.          |

## ASSEMBLY

|               |                        |
|---------------|------------------------|
| Speaker       | R. Scott Benson, M.D.  |
| Speaker-Elect | Melinda L. Young, M.D. |
| Recorder      | Jenny L. Boyer, M.D.   |

## MEDICAL DIRECTOR'S OFFICE

Medical Director and CEO James H. Scully, Jr., M.D.

## BOARD OF TRUSTEES

|                          |                            |
|--------------------------|----------------------------|
| Jeffrey Akaka, M.D.      | Judith F. Kashtan, M.D.    |
| Carol A. Bernstein, M.D. | Molly K. McVoy, M.D.       |
| Brian Crowley, M.D.      | James E. Ninninger, M.D.   |
| Jeffrey Geller, M.D.     | John M. Oldham, M.D.       |
| Marc David Graff, M.D.   | Alan F. Schatzberg, M.D.   |
| James A. Greene, M.D.    | Alik S. Widge, M.D., Ph.D. |

## PUBLISHER

Rebecca D. Rinehart

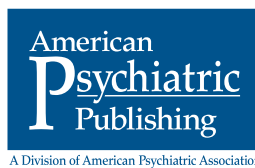

The American Journal of Psychiatry is online at [ajp.psychiatryonline.org](http://ajp.psychiatryonline.org)

THE AMERICAN PSYCHIATRIC ASSOCIATION  
Chairpersons of Councils, Commissions, Committees, and Task Forces

Standing Committees

**Bylaws**

Eric M. Plakun, M.D.

**Elections**

Robert E. Kelly, Jr., M.D.

**Ethics**

Richard D. Milone, M.D.

**Finance and Budget**

Frank W. Brown, M.D.

*Audit*

David Fassler, M.D.

*Investment Oversight*

Larry R. Faulkner, M.D.

**Joint Reference**

Jeffrey A. Lieberman, M.D.

**Membership**

Joseph Ezra V. Rubin, M.D.

**Nominating**

John M. Oldham, M.D.

**Tellers**

Tanya Nayyirah Alim, M.D.

**Council on Addiction Psychiatry**

John A. Renner, M.D.

**Council on Advocacy and Government Relations**

Robert Paul Cabaj, M.D.

*Advocacy and Litigation Funding*

Renee L. Binder, M.D.

**Council on Children, Adolescents, and Their Families**

Louis J. Kraus, M.D.

*Agnes Purcell McGavin Award*

*Blanche F. Ittleson Research Award*

Karen Dineen Wagner, M.D.

**Council on Communications**

Jeffrey A. Borenstein, M.D.

**Council on Geriatric Psychiatry**

Brent P. Forester, M.D.

**Council on Healthcare Systems and Financing**

Sul Ross Olen Thorward, M.D.

*Reimbursement for Psychiatric Care*

Bruce J. Schwartz, M.D.

*RBRVS, Codes and Reimbursement*

Ronald M. Burd, M.D.

**Council on Medical Education and Lifelong Learning**

Sandra Sexson, M.D.

*APA Public Psychiatry Fellowship Selection Committee*

Stephen M. Goldfinger, M.D.

*APA/SAMHSA Minority Fellowship Selection and Advisory*

Toi B. Harris, M.D.

*Scientific Program*

Joseph A. Cheong, M.D.

*Scientific Program Committee of the Institute on Psychiatric Services*

David Alan Pollack, M.D.

*Task Force to Update the Ethics Annotations*

Laura W. Roberts, M.D.

*Vestermark Award Committee*

Frederick G. Guggenheim, M.D.

**Council on Minority Health and Health Disparities**

Sandra C. Walker, M.D.

**Council on Psychiatry And Law**

Patricia R. Recupero, M.D., J.D.

*Isaac Ray/Human Rights Award*

Steven K. Hoge, M.D.

*Judicial Action*

Paul S. Appelbaum, M.D.

*Manfred S. Guttmacher Award*

Rebecca W. Brendel, M.D., J.D.

**Council on Psychosomatic Medicine  
(Consultation Liaison Psychiatry)**

Joel E. Dimsdale, M.D.

**Council on Research and Quality Care**

Joel Yager, M.D.

*Electronic Health Records*

Steven Roy Daviss, M.D.

*Psychiatric Dimensions of Disasters*

Robert J. Ursano, M.D.

*Research Awards*

Lewis L. Judd, M.D.

*Steering Committee on Practice Guidelines*

Joel Yager, M.D.

*Task Force on DSM-V*

David J. Kupfer, M.D.

*Task Force to Revise the Practice of Electroconvulsive Therapy*

Sarah H. Lisanby, M.D.

Schizophrenia can  
tear patients apart

For the treatment of schizophrenia

LATUDA can help put your  
patients back together

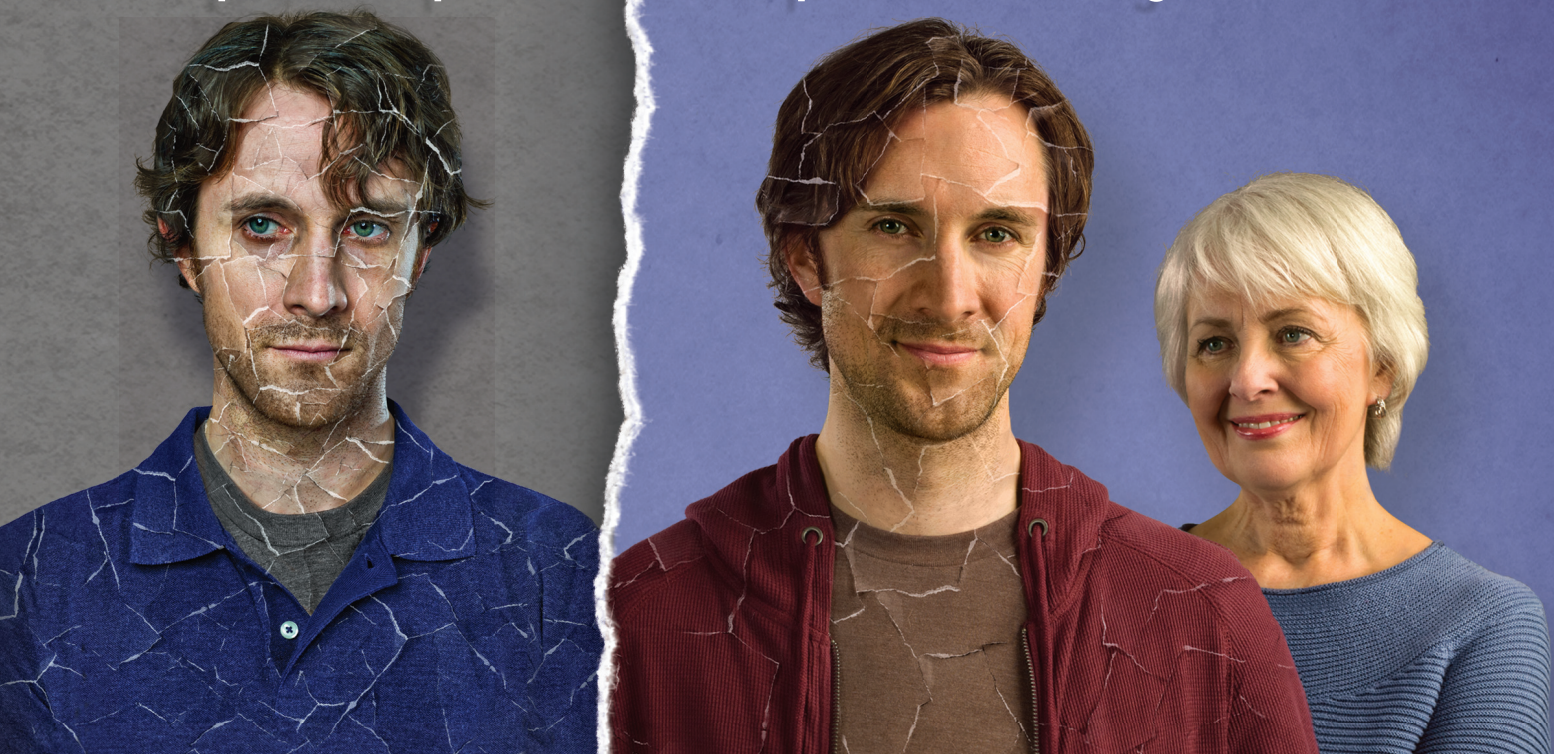

- Symptom improvement was established in several pivotal trials<sup>1</sup>
- The safety and tolerability of LATUDA were evaluated in pivotal trials and multiple studies up to 52 weeks<sup>1</sup>
- The recommended starting dose, 40 mg/day, is an effective dose with no initial dose titration required. The maximum recommended dose is 160 mg/day<sup>1</sup>
  - LATUDA should be taken with food (at least 350 calories)
  - Dose adjustment is recommended in moderate and severe renal and hepatic impairment patients. The recommended starting dose is 20 mg. The dose in moderate and severe renal impairment patients and in moderate hepatic impairment patients should not exceed 80 mg/day. The dose in severe hepatic impairment patients should not exceed 40 mg/day
  - LATUDA should not be used in combination with strong CYP3A4 inhibitors such as ketoconazole or strong CYP3A4 inducers such as rifampin. When coadministered with a moderate CYP3A4 inhibitor such as diltiazem, the recommended starting dose of LATUDA is 20 mg/day and the maximum recommended dose is 80 mg/day

#### INDICATIONS AND USAGE

LATUDA is an atypical antipsychotic indicated for the treatment of patients with schizophrenia. Efficacy was established in five 6-week controlled studies of adult patients with schizophrenia. The effectiveness of LATUDA for longer-term use, that is, for more than 6 weeks, has not been established in controlled studies. Therefore, the physician who elects to use LATUDA for extended periods should periodically re-evaluate the long-term usefulness of the drug for the individual patient.

#### IMPORTANT SAFETY INFORMATION FOR LATUDA

##### WARNING: INCREASED MORTALITY IN ELDERLY PATIENTS WITH DEMENTIA-RELATED PSYCHOSIS

See full prescribing information for complete boxed warning.

- Elderly patients with dementia-related psychosis treated with antipsychotic drugs are at an increased risk of death.
- LATUDA is not approved for the treatment of patients with dementia-related psychosis.

Please see additional Important Safety Information, including **Boxed Warning**, and Brief Summary of Prescribing Information on adjacent pages.

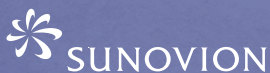

LATUDA and  are registered trademarks of Dainippon Sumitomo Pharma Co., Ltd. Sunovion Pharmaceuticals Inc. is a U.S. subsidiary of Dainippon Sumitomo Pharma Co., Ltd.

©2012 Sunovion Pharmaceuticals Inc. All rights reserved. 9/12 LATV367-12

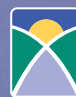

**Latuda**<sup>®</sup>  
(lurasidone HCl) tablets  
20mg | 40mg | 80mg | 120mg

## INDICATIONS AND USAGE

LATUDA is an atypical antipsychotic agent indicated for the treatment of patients with schizophrenia. Efficacy was established in five 6-week controlled studies of adult patients with schizophrenia. The effectiveness of LATUDA for longer-term use, that is, for more than 6 weeks, has not been established in controlled studies. Therefore, the physician who elects to use LATUDA for extended periods should periodically re-evaluate the long-term usefulness of the drug for the individual patient.

## IMPORTANT SAFETY INFORMATION FOR LATUDA

### WARNING: INCREASED MORTALITY IN ELDERLY PATIENTS WITH DEMENTIA-RELATED PSYCHOSIS

See full prescribing information for complete boxed warning.

- Elderly patients with dementia-related psychosis treated with antipsychotic drugs are at an increased risk of death.
- LATUDA is not approved for the treatment of patients with dementia-related psychosis.

## CONTRAINDICATIONS

LATUDA is contraindicated in the following:

- Any patient with a known hypersensitivity to lurasidone HCl or any components in the formulation. Angioedema has been observed with lurasidone.
- Concomitant use with strong CYP3A4 inhibitors (e.g., ketoconazole).
- Concomitant use with strong CYP3A4 inducers (e.g., rifampin).

## WARNINGS AND PRECAUTIONS

**Cerebrovascular Adverse Reactions, Including Stroke:** LATUDA is not approved for the treatment of patients with dementia-related psychosis.

**Neuroleptic Malignant Syndrome (NMS):** NMS, a potentially fatal symptom complex, has been reported with administration of antipsychotic drugs, including LATUDA. NMS can cause hyperpyrexia, muscle rigidity, altered mental status and evidence of autonomic instability (irregular pulse or blood pressure, tachycardia, diaphoresis, and cardiac dysrhythmia). Additional signs may include elevated creatine phosphokinase, myoglobinuria (rhabdomyolysis), and acute renal failure. The management of NMS should include: 1) immediate discontinuation of antipsychotic drugs and other drugs not essential to concurrent therapy; 2) intensive symptomatic treatment and medical monitoring; and 3) treatment of any concomitant serious medical problems for which specific treatments are available.

**Tardive Dyskinesia (TD):** The risk of developing TD and the likelihood that it will become irreversible are believed to increase as the duration of treatment and the total cumulative dose of antipsychotic drugs administered to the patient increase. However, the syndrome can develop, although much less commonly, after relatively brief treatment periods at low doses. Given these considerations, LATUDA should be prescribed in a manner that is most likely to minimize the occurrence of TD. If signs and symptoms appear in a patient on LATUDA, drug discontinuation should be considered.

### Metabolic Changes

**Hyperglycemia and Diabetes Mellitus:** Hyperglycemia, in some cases extreme and associated with ketoacidosis or hyperosmolar coma or death, has been reported in patients treated with atypical antipsychotics. Patients with risk factors for diabetes mellitus (e.g., obesity, family history of diabetes) who are starting treatment with atypical antipsychotics should undergo fasting blood glucose testing at the beginning of and periodically during treatment. Any patient treated with atypical antipsychotics should be monitored for symptoms of hyperglycemia including polydipsia, polyuria, polyphagia, and weakness. Patients who develop symptoms of hyperglycemia during treatment with atypical antipsychotics should undergo fasting blood glucose testing. In some cases, hyperglycemia has resolved when the atypical antipsychotic was discontinued; however, some patients required continuation of anti-diabetic treatment despite discontinuation of the suspect drug.

**Dyslipidemia:** Undesirable alterations in lipids have been observed in patients treated with atypical antipsychotics.

**Weight Gain:** Weight gain has been observed with atypical antipsychotic use. Clinical monitoring of weight is recommended.

**Hyperprolactinemia:** As with other drugs that antagonize dopamine D2 receptors, LATUDA elevates prolactin levels. Galactorrhea, amenorrhea, gynecomastia, and impotence have been reported in patients receiving prolactin-elevating compounds.

**Leukopenia, Neutropenia, and Agranulocytosis:** Leukopenia/neutropenia has been reported during treatment with antipsychotic agents. Agranulocytosis (including fatal cases) has been reported with other agents in the class. Patients with a preexisting low white blood cell count (WBC) or a history of drug induced leukopenia/neutropenia should have their complete blood count (CBC) monitored frequently during the first few months of therapy, and LATUDA should be discontinued at the first sign of a decline in WBC in the absence of other causative factors.

**Orthostatic Hypotension and Syncope:** LATUDA may cause orthostatic hypotension. Orthostatic vital signs should be monitored in patients who are vulnerable to hypotension and in patients with known cardiovascular disease or cerebrovascular disease.

**Seizures:** LATUDA should be used cautiously in patients with a history of seizures or with conditions that lower seizure threshold (e.g., Alzheimer's dementia).

**Potential for Cognitive and Motor Impairment:** In short-term, placebo-controlled trials, somnolence was reported in 17.0% (256/1508) of patients treated with LATUDA compared to 7.1% (50/708) of placebo patients, respectively. Patients should be cautioned about operating hazardous machinery, including motor vehicles, until they are reasonably certain that therapy with LATUDA does not affect them adversely.

**Body Temperature Regulation:** Disruption of the body's ability to reduce core body temperature has been attributed to antipsychotic agents. Appropriate care is advised when prescribing LATUDA for patients who will be experiencing conditions that may contribute to an elevation in core body temperature, e.g., exercising strenuously, exposure to extreme heat, receiving concomitant medication with anticholinergic activity, or being subject to dehydration.

**Suicide:** The possibility of suicide attempt is inherent in psychotic illness and close supervision of high-risk patients should accompany drug therapy. Prescriptions for LATUDA should be written for the smallest quantity of tablets consistent with good patient management in order to reduce the risk of overdose.

**Dysphagia:** Esophageal dysmotility and aspiration have been associated with antipsychotic drug use. Aspiration pneumonia is a common cause of morbidity and mortality in elderly patients, in particular those with advanced Alzheimer's dementia. LATUDA and other antipsychotic drugs should be used cautiously in patients at risk for aspiration pneumonia.

## ADVERSE REACTIONS

**Commonly Observed Adverse Reactions:** (incidence  $\geq$ 5% and at least twice the rate of placebo) in patients treated with LATUDA were somnolence, akathisia, nausea and parkinsonism.

Please see brief summary of prescribing information on adjacent pages, including **Boxed Warning**.

**Reference:** 1. LATUDA prescribing information. Sunovion Pharmaceuticals Inc. May 2012.

FOR MORE INFORMATION, PLEASE CALL 1-888-394-7377 OR VISIT [www.LatudaHCP.com](http://www.LatudaHCP.com).

## Brief Summary (for Full Prescribing Information, see package insert)

### WARNING: INCREASED MORTALITY IN ELDERLY PATIENTS WITH DEMENTIA-RELATED PSYCHOSIS

- Elderly patients with dementia-related psychosis treated with antipsychotic drugs are at an increased risk of death [see Warnings and Precautions (5.1)].
- LATUDA is not approved for use in patients with dementia-related psychosis [see Warnings and Precautions 5.1].

## 1 INDICATIONS AND USAGE

LATUDA is indicated for the treatment of patients with schizophrenia.

The efficacy of LATUDA in schizophrenia was established in five 6-week controlled studies of adult patients with schizophrenia [Clinical Studies (14.1)].

The effectiveness of LATUDA for longer-term use, that is, for more than 6 weeks, has not been established in controlled studies. Therefore, the physician who elects to use LATUDA for extended periods should periodically re-evaluate the long-term usefulness of the drug for the individual patient [see Dosage and Administration (2)].

## 4 CONTRAINDICATIONS

LATUDA is contraindicated in the following:

- Any patient with a known hypersensitivity to lurasidone HCl or any components in the formulation. Angioedema has been observed with lurasidone [see Adverse Reactions (6.1)].
- Concomitant use with strong CYP3A4 inhibitors (e.g., ketoconazole) [see Drug Interactions (7.1)].
- Concomitant use with strong CYP3A4 inducers (e.g., rifampin) [see Drug Interactions (7.1)].

## 5 WARNINGS AND PRECAUTIONS

### 5.1 Increased Mortality in Elderly Patients with Dementia-Related Psychosis

Elderly patients with dementia-related psychosis treated with antipsychotic drugs are at an increased risk of death. Analyses of 17 placebo-controlled trials (modal duration of 10 weeks), largely in patients taking atypical antipsychotic drugs, revealed a risk of death in drug-treated patients of between 1.6- to 1.7- times the risk of death in placebo-treated patients. Over the course of a typical 10-week controlled trial, the rate of death in drug-treated patients was about 4.5%, compared to a rate of about 2.6% in the placebo group. Although the causes of death were varied, most of the deaths appeared to be either cardiovascular (e.g., heart failure, sudden death) or infectious (e.g., pneumonia) in nature. Observational studies suggest that, similar to atypical antipsychotic drugs, treatment with conventional antipsychotic drugs may increase mortality. The extent to which the findings of increased mortality in observational studies may be attributed to the antipsychotic drug as opposed to some characteristic(s) of the patients is not clear. LATUDA is not approved for the treatment of patients with dementia-related psychosis [see Boxed Warning].

### 5.2 Cerebrovascular Adverse Reactions, Including Stroke in Elderly Patients with Dementia-Related Psychosis

In placebo-controlled trials with risperidone, aripiprazole, and olanzapine in elderly subjects with dementia, there was a higher incidence of cerebrovascular adverse reactions (cerebrovascular accidents and transient ischemic attacks), including fatalities, compared to placebo-treated subjects. LATUDA is not approved for the treatment of patients with dementia-related psychosis [see also Boxed Warning and Warnings and Precautions (5.1)].

### 5.3 Neuroleptic Malignant Syndrome

A potentially fatal symptom complex sometimes referred to as Neuroleptic Malignant Syndrome (NMS) has been reported in association with administration of antipsychotic drugs, including LATUDA.

Clinical manifestations of NMS are hyperpyrexia, muscle rigidity, altered mental status, and evidence of autonomic instability (irregular pulse or blood pressure, tachycardia, diaphoresis, and cardiac dysrhythmia). Additional signs may include elevated creatinine phosphokinase, myoglobinuria (rhabdomyolysis), and acute renal failure.

The diagnostic evaluation of patients with this syndrome is complicated. It is important to exclude cases where the clinical presentation includes both serious medical illness (e.g., pneumonia, systemic infection) and untreated or inadequately treated extrapyramidal signs and symptoms (EPS). Other important considerations in the differential diagnosis include central anticholinergic toxicity, heat stroke, drug fever, and primary central nervous system pathology.

The management of NMS should include: 1) immediate discontinuation of antipsychotic drugs and other drugs not essential to concurrent therapy; 2) intensive symptomatic treatment and medical monitoring; and 3) treatment of any concomitant serious medical problems for which specific treatments are available. There is no general agreement about specific pharmacological treatment regimens for NMS.

If a patient requires antipsychotic drug treatment after recovery from NMS, the potential reintroduction of drug therapy should be carefully considered. If reintroduced, the patient should be carefully monitored, since recurrences of NMS have been reported.

### 5.4 Tardive Dyskinesia

Tardive dyskinesia is a syndrome consisting of potentially irreversible, involuntary, dyskinetic movements that can develop in patients treated with antipsychotic

drugs. Although the prevalence of the syndrome appears to be highest among the elderly, especially elderly women, it is impossible to rely upon prevalence estimates to predict, at the inception of antipsychotic treatment, which patients are likely to develop the syndrome. Whether antipsychotic drug products differ in their potential to cause tardive dyskinesia is unknown.

The risk of developing tardive dyskinesia and the likelihood that it will become irreversible are believed to increase as the duration of treatment and the total cumulative dose of antipsychotic drugs administered to the patient increase. However, the syndrome can develop, although much less commonly, after relatively brief treatment periods at low doses.

There is no known treatment for established cases of tardive dyskinesia, although the syndrome may remit, partially or completely, if antipsychotic treatment is withdrawn. Antipsychotic treatment, itself, however, may suppress (or partially suppress) the signs and symptoms of the syndrome and thereby may possibly mask the underlying process. The effect that symptomatic suppression has upon the long-term course of the syndrome is unknown.

Given these considerations, LATUDA should be prescribed in a manner that is most likely to minimize the occurrence of tardive dyskinesia. Chronic antipsychotic treatment should generally be reserved for patients who suffer from a chronic illness that (1) is known to respond to antipsychotic drugs, and (2) for whom alternative, equally effective, but potentially less harmful treatments are not available or appropriate. In patients who do require chronic treatment, the smallest dose and the shortest duration of treatment producing a satisfactory clinical response should be sought. The need for continued treatment should be reassessed periodically.

If signs and symptoms of tardive dyskinesia appear in a patient on LATUDA, drug discontinuation should be considered. However, some patients may require treatment with LATUDA despite the presence of the syndrome.

### 5.5 Metabolic Changes

Atypical antipsychotic drugs have been associated with metabolic changes that may increase cardiovascular/cerebrovascular risk. These metabolic changes include hyperglycemia, dyslipidemia, and body weight gain. While all of the drugs in the class have been shown to produce some metabolic changes, each drug has its own specific risk profile.

#### Hyperglycemia and Diabetes Mellitus

Hyperglycemia, in some cases extreme and associated with ketoacidosis or hyperosmolar coma or death, has been reported in patients treated with atypical antipsychotics. Assessment of the relationship between atypical antipsychotic use and glucose abnormalities is complicated by the possibility of an increased background risk of diabetes mellitus in patients with schizophrenia and the increasing incidence of diabetes mellitus in the general population. Given these confounders, the relationship between atypical antipsychotic use and hyperglycemia-related adverse events is not completely understood. However, epidemiological studies suggest an increased risk of treatment-emergent hyperglycemia-related adverse events in patients treated with the atypical antipsychotics. Because LATUDA was not marketed at the time these studies were performed, it is not known if LATUDA is associated with this increased risk.

Patients with an established diagnosis of diabetes mellitus who are started on atypical antipsychotics should be monitored regularly for worsening of glucose control. Patients with risk factors for diabetes mellitus (e.g., obesity, family history of diabetes) who are starting treatment with atypical antipsychotics should undergo fasting blood glucose testing at the beginning of treatment and periodically during treatment. Any patient treated with atypical antipsychotics should be monitored for symptoms of hyperglycemia including polydipsia, polyuria, polyphagia, and weakness. Patients who develop symptoms of hyperglycemia during treatment with atypical antipsychotics should undergo fasting blood glucose testing. In some cases, hyperglycemia has resolved when the atypical antipsychotic was discontinued; however, some patients required continuation of anti-diabetic treatment despite discontinuation of the suspect drug.

Pooled data from short-term, placebo-controlled studies are presented in Table 1.

**Table 1: Change in Fasting Glucose**

|                                                        | LATUDA        |              |                |               |                |              |
|--------------------------------------------------------|---------------|--------------|----------------|---------------|----------------|--------------|
|                                                        | Placebo       | 20 mg/day    | 40 mg/day      | 80 mg/day     | 120 mg/day     | 160 mg/day   |
| Mean Change from Baseline (mg/dL)                      |               |              |                |               |                |              |
|                                                        | n=680         | n=71         | n=478          | n=508         | n=283          | n=113        |
| Serum Glucose                                          | -0.0          | -0.6         | 2.6            | -0.4          | 2.5            | 2.5          |
| Proportion of Patients with Shifts to $\geq 126$ mg/dL |               |              |                |               |                |              |
| Serum Glucose ( $\geq 126$ mg/dL)                      | 8.3% (52/628) | 11.7% (7/60) | 12.7% (57/449) | 6.8% (32/472) | 10.0% (26/260) | 5.6% (6/108) |

In the uncontrolled, longer-term studies (primarily open-label extension studies), LATUDA was associated with a mean change in glucose of +1.8 mg/dL at week 24 (n=355), +0.8 mg/dL at week 36 (n=299) and +2.3 mg/dL at week 52 (n=307).

#### Dyslipidemia

Undesirable alterations in lipids have been observed in patients treated with atypical antipsychotics. Pooled data from short-term, placebo-controlled studies are presented in Table 2.

**Table 2: Change in Fasting Lipids**

|                                           | Placebo        | LATUDA       |                |               |                |              |
|-------------------------------------------|----------------|--------------|----------------|---------------|----------------|--------------|
|                                           |                | 20 mg/day    | 40 mg/day      | 80 mg/day     | 120 mg/day     | 160 mg/day   |
| <b>Mean Change from Baseline (mg/dL)</b>  |                |              |                |               |                |              |
|                                           | n=660          | n=71         | n=466          | n=499         | n=268          | n=115        |
| Total Cholesterol                         | -5.8           | -12.3        | -5.7           | -6.2          | -3.8           | -6.9         |
| Triglycerides                             | -13.4          | -29.1        | -5.1           | -13.0         | -3.1           | -10.6        |
| <b>Proportion of Patients with Shifts</b> |                |              |                |               |                |              |
| Total Cholesterol (≥ 240 mg/dL)           | 5.3% (30/571)  | 13.8% (8/58) | 6.2% (25/402)  | 5.3% (23/434) | 3.8% (9/238)   | 4.0% (4/101) |
| Triglycerides (≥ 200 mg/dL)               | 10.1% (53/526) | 14.3% (7/49) | 10.8% (41/379) | 6.3% (25/400) | 10.5% (22/209) | 7.0% (7/100) |

In the uncontrolled, longer-term studies (primarily open-label extension studies), LATUDA was associated with a mean change in total cholesterol and triglycerides of -3.8 (n=356) and -15.1 (n=357) mg/dL at week 24, -3.1 (n=303) and -4.8 (n=303) mg/dL at week 36 and -2.5 (n=307) and -6.9 (n=307) mg/dL at week 52, respectively.

#### Weight Gain

Weight gain has been observed with atypical antipsychotic use. Clinical monitoring of weight is recommended.

Pooled data from short-term, placebo-controlled studies are presented in Table 4. The mean weight gain was 0.43 kg for LATUDA-treated patients compared to -0.02 kg for placebo-treated patients. Change in weight from baseline for olanzapine was 4.15 kg and for quetiapine extended-release was 2.09 kg in Studies 3 and 5 [see *Clinical Studies* (14.1)], respectively. The proportion of patients with a ≥ 7% increase in body weight (at Endpoint) was 4.8% for LATUDA-treated patients versus 3.3% for placebo-treated patients.

**Table 3: Mean Change in Weight (kg) from Baseline**

|              | Placebo (n=696) | LATUDA           |                   |                   |                    |                    |
|--------------|-----------------|------------------|-------------------|-------------------|--------------------|--------------------|
|              |                 | 20 mg/day (n=71) | 40 mg/day (n=484) | 80 mg/day (n=526) | 120 mg/day (n=291) | 160 mg/day (n=114) |
| All Patients | -0.02           | -0.15            | 0.22              | 0.54              | 0.68               | 0.60               |

In the uncontrolled, longer-term studies (primarily open-label extension studies), LATUDA was associated with a mean change in weight of -0.69 kg at week 24 (n=755), -0.59 kg at week 36 (n=443) and -0.73 kg at week 52 (n=377).

#### 5.6 Hyperprolactinemia

As with other drugs that antagonize dopamine D<sub>2</sub> receptors, LATUDA elevates prolactin levels.

Hyperprolactinemia may suppress hypothalamic GnRH, resulting in reduced pituitary gonadotrophin secretion. This, in turn, may inhibit reproductive function by impairing gonadal steroidogenesis in both female and male patients. Galactorrhea, amenorrhea, gynecomastia, and impotence have been reported with prolactin-elevating compounds. Long-standing hyperprolactinemia, when associated with hypogonadism, may lead to decreased bone density in both female and male patients [see *Adverse Reactions* (6)].

In short-term, placebo-controlled studies, the median change from baseline to endpoint in prolactin levels for LATUDA-treated patients was 0.4 ng/mL and was -1.9 ng/mL in the placebo-treated patients. The median change from baseline to endpoint for males was 0.5 ng/mL and for females was -0.2 ng/mL. Median changes for prolactin by dose are shown in Table 5.

**Table 4: Median Change in Prolactin (ng/mL) from Baseline**

|              | Placebo      | LATUDA      |              |              |             |             |
|--------------|--------------|-------------|--------------|--------------|-------------|-------------|
|              |              | 20 mg/day   | 40 mg/day    | 80 mg/day    | 120 mg/day  | 160 mg/day  |
| All Patients | -1.9 (n=672) | -1.1 (n=70) | -1.4 (n=476) | -0.2 (n=495) | 3.3 (n=284) | 3.3 (n=115) |
| Females      | -5.1 (n=200) | -0.7 (n=19) | -4.0 (n=149) | -0.2 (n=150) | 6.7 (n=70)  | 7.1 (n=36)  |
| Males        | -1.3 (n=472) | -1.2 (n=51) | -0.7 (n=327) | -0.2 (n=345) | 3.1 (n=214) | 2.4 (n=79)  |

The proportion of patients with prolactin elevations ≥ 5× upper limit of normal (ULN) was 2.8% for LATUDA-treated patients versus 1.0% for placebo-treated patients. The proportion of female patients with prolactin elevations ≥ 5× ULN was 5.7% for LATUDA-treated patients versus 2.0% for placebo-treated female patients. The proportion of male patients with prolactin elevations > 5× ULN was 1.6% versus 0.6% for placebo-treated male patients.

In the uncontrolled longer-term studies (primarily open-label extension studies), LATUDA was associated with a median change in prolactin of -0.9 ng/mL at week 24 (n=357), -5.3 ng/mL at week 36 (n=190) and -2.2 ng/mL at week 52 (n=307).

Tissue culture experiments indicate that approximately one-third of human breast cancers are prolactin-dependent *in vitro*, a factor of potential importance if

the prescription of these drugs is considered in a patient with previously detected breast cancer. As is common with compounds which increase prolactin release, an increase in mammary gland neoplasia was observed in a LATUDA carcinogenicity study conducted in rats and mice [see *Nonclinical Toxicology* (13)]. Neither clinical studies nor epidemiologic studies conducted to date have shown an association between chronic administration of this class of drugs and tumorigenesis in humans, but the available evidence is too limited to be conclusive.

#### 5.7 Leukopenia, Neutropenia and Agranulocytosis

Leukopenia/neutropenia has been reported during treatment with antipsychotic agents. Agranulocytosis (including fatal cases) has been reported with other agents in the class.

Possible risk factors for leukopenia/neutropenia include pre-existing low white blood cell count (WBC) and history of drug-induced leukopenia/neutropenia. Patients with a pre-existing low WBC or a history of drug-induced leukopenia/neutropenia should have their complete blood count (CBC) monitored frequently during the first few months of therapy and LATUDA should be discontinued at the first sign of decline in WBC, in the absence of other causative factors.

Patients with neutropenia should be carefully monitored for fever or other symptoms or signs of infection and treated promptly if such symptoms or signs occur. Patients with severe neutropenia (absolute neutrophil count < 1000/mm<sup>3</sup>) should discontinue LATUDA and have their WBC followed until recovery.

#### 5.8 Orthostatic Hypotension and Syncope

LATUDA may cause orthostatic hypotension, perhaps due to its α<sub>1</sub>-adrenergic receptor antagonism. The incidence of orthostatic hypotension and syncope events from short-term, placebo-controlled studies was (LATUDA incidence, placebo incidence): orthostatic hypotension [0.3% (5/1508), 0.1% (1/708)] and syncope [0.1% (2/1508), 0% (0/708)]. Assessment of orthostatic hypotension was defined by vital sign changes (≥ 20 mm Hg decrease in systolic blood pressure and ≥ 10 bpm increase in pulse from sitting to standing or supine to standing positions). In short-term clinical trials, orthostatic hypotension occurred with a frequency of 0.8% with LATUDA 40 mg, 2.1% with LATUDA 80 mg, 1.7% with LATUDA 120 mg and 0.8% with LATUDA 160 mg compared to 0.7% with placebo.

Orthostatic vital signs should be monitored in patients who are vulnerable to hypotension (e.g., dehydration, hypovolemia, and treatment with antihypertensive medications), and in patients with known cardiovascular disease (e.g., heart failure, history of myocardial infarction, ischemia, or conduction abnormalities), or cerebrovascular disease.

#### 5.9 Seizures

As with other antipsychotic drugs, LATUDA should be used cautiously in patients with a history of seizures or with conditions that lower the seizure threshold, e.g., Alzheimer's dementia. Conditions that lower the seizure threshold may be more prevalent in patients 65 years or older.

In short-term, placebo-controlled trials, seizures/convulsions occurred in 0.1% (2/1508) of patients treated with LATUDA compared to 0.1% (1/708) placebo-treated patients.

#### 5.10 Potential for Cognitive and Motor Impairment

LATUDA, like other antipsychotics, has the potential to impair judgment, thinking or motor skills.

In short-term, placebo-controlled trials, somnolence was reported by 17.0% (256/1508) of patients treated with LATUDA (15.5% LATUDA 20 mg, 15.6% LATUDA 40 mg, 15.2% LATUDA 80 mg, 26.5% LATUDA 120 mg and 8.3% LATUDA 160 mg/day) compared to 7.1% (50/708) of placebo patients. In these short-term trials, somnolence included: hypersomnia, hypersomnolence, sedation and somnolence.

Patients should be cautioned about operating hazardous machinery, including motor vehicles, until they are reasonably certain that therapy with LATUDA does not affect them adversely.

#### 5.11 Body Temperature Regulation

Disruption of the body's ability to reduce core body temperature has been attributed to antipsychotic agents. Appropriate care is advised when prescribing LATUDA for patients who will be experiencing conditions that may contribute to an elevation in core body temperature, e.g., exercising strenuously, exposure to extreme heat, receiving concomitant medication with anticholinergic activity, or being subject to dehydration [see *Patient Counseling Information* (17.9)].

#### 5.12 Suicide

The possibility of a suicide attempt is inherent in psychotic illness and close supervision of high-risk patients should accompany drug therapy. Prescriptions for LATUDA should be written for the smallest quantity of tablets consistent with good patient management in order to reduce the risk of overdose.

In short-term, placebo-controlled studies in patients with schizophrenia, the incidence of treatment-emergent suicidal ideation was 0.4% (6/1508) for LATUDA-treated patients compared to 0.8% (6/708) on placebo. No suicide attempts or completed suicides were reported in these studies.

#### 5.13 Dysphagia

Esophageal dysmotility and aspiration have been associated with antipsychotic drug use. Aspiration pneumonia is a common cause of morbidity and mortality in elderly patients, in particular those with advanced Alzheimer's dementia. LATUDA and other antipsychotic drugs should be used cautiously in patients at risk for aspiration pneumonia.

### 5.14 Use in Patients with Concomitant Illness

Clinical experience with LATUDA in patients with certain concomitant illnesses is limited [see *Clinical Pharmacology* (12.3)].

Patients with Parkinson's Disease or Dementia with Lewy Bodies are reported to have an increased sensitivity to antipsychotic medication. Manifestations of this increased sensitivity include confusion, obtundation, postural instability with frequent falls, extrapyramidal symptoms, and clinical features consistent with the neuroleptic malignant syndrome.

LATUDA has not been evaluated or used to any appreciable extent in patients with a recent history of myocardial infarction or unstable heart disease. Patients with these diagnoses were excluded from premarketing clinical trials. Because of the risk of orthostatic hypotension with LATUDA, caution should be observed in patients with known cardiovascular disease [see *Warnings and Precautions* (5.8)].

### 6 ADVERSE REACTIONS

The following adverse reactions are discussed in more detail in other sections of the labeling:

- Use in Elderly Patients with Dementia-Related Psychosis [see *Boxed Warning and Warnings and Precautions* (5.1)]
- Cerebrovascular Adverse Reactions, Including Stroke [see *Warnings and Precautions* (5.2)]
- Neuroleptic Malignant Syndrome [see *Warnings and Precautions* (5.3)]
- Tardive Dyskinesia [see *Warnings and Precautions* (5.4)]
- Hyperglycemia and Diabetes Mellitus [see *Warnings and Precautions* (5.5)]
- Hyperprolactinemia [see *Warnings and Precautions* (5.6)]
- Leukopenia, Neutropenia, and Agranulocytosis [see *Warnings and Precautions* (5.7)]
- Orthostatic Hypotension and Syncope [see *Warnings and Precautions* (5.8)]
- Seizures [see *Warnings and Precautions* (5.9)]
- Potential for Cognitive and Motor Impairment [see *Warnings and Precautions* (5.10)]
- Body Temperature Regulation [see *Warnings and Precautions* (5.11)]
- Suicide [see *Warnings and Precautions* (5.12)]
- Dysphagia [see *Warnings and Precautions* (5.13)]

#### 6.1 Clinical Trials Experience

Because clinical trials are conducted under widely varying conditions, adverse reaction rates observed in clinical trials of a drug cannot be directly compared to rates in the clinical trials of another drug and may not reflect the rates observed in clinical practice.

The information below is derived from a clinical study database for LATUDA consisting of 2905 patients with schizophrenia exposed to one or more doses with a total experience of 985.3 patient-years. Of these patients, 1508 participated in short-term, placebo-controlled schizophrenia studies with doses of 20 mg, 40 mg, 80 mg, 120 mg or 160 mg once daily. A total of 769 LATUDA-treated patients had at least 24 weeks and 371 LATUDA-treated patients had at least 52 weeks of exposure.

Adverse events during exposure to study treatment were obtained by general inquiry and voluntarily reported adverse experiences, as well as results from physical examinations, vital signs, ECGs, weights and laboratory investigations. Adverse experiences were recorded by clinical investigators using their own terminology. In order to provide a meaningful estimate of the proportion of individuals experiencing adverse events, events were grouped in standardized categories using MedDRA terminology.

The following findings are based on the short-term, placebo-controlled premarketing studies for schizophrenia in which LATUDA was administered at daily doses ranging from 20 to 160 mg (n=1508).

**Commonly Observed Adverse Reactions:** The most common adverse reactions (incidence ≥ 5% and at least twice the rate of placebo) in patients treated with LATUDA were somnolence, akathisia, nausea and parkinsonism.

**Adverse Reactions Associated with Discontinuation of Treatment:** A total of 9.5% (143/1508) LATUDA-treated patients and 9.3% (66/708) of placebo-treated patients discontinued due to adverse reactions. There were no adverse reactions associated with discontinuation in subjects treated with LATUDA that were at least 2% and at least twice the placebo rate.

**Adverse Reactions Occurring at an Incidence of 2% or More in LATUDA-Treated Patients:** Adverse reactions associated with the use of LATUDA (incidence of 2% or greater, rounded to the nearest percent and LATUDA incidence greater than placebo) that occurred during acute therapy (up to 6 weeks in patients with schizophrenia) are shown in Table 5.

**Table 5: Adverse Reactions in 2% or More of LATUDA-Treated Patients and That Occurred at Greater Incidence than in the Placebo-Treated Patients in Short-term Schizophrenia Studies**

| Body System or Organ Class<br>Dictionary-derived Term | Percentage of Patients Reporting Reaction |                        |
|-------------------------------------------------------|-------------------------------------------|------------------------|
|                                                       | Placebo<br>(N=708)                        | All LATUDA<br>(N=1508) |
| <b>Gastrointestinal Disorders</b>                     |                                           |                        |
| Nausea                                                | 5                                         | 10                     |
| Vomiting                                              | 6                                         | 8                      |
| Dyspepsia                                             | 5                                         | 6                      |
| Salivary Hypersecretion                               | <1                                        | 2                      |

| Body System or Organ Class<br>Dictionary-derived Term  | Percentage of Patients Reporting Reaction |                        |
|--------------------------------------------------------|-------------------------------------------|------------------------|
|                                                        | Placebo<br>(N=708)                        | All LATUDA<br>(N=1508) |
| <b>Musculoskeletal and Connective Tissue Disorders</b> |                                           |                        |
| Back Pain                                              | 2                                         | 3                      |
| <b>Nervous System Disorders</b>                        |                                           |                        |
| Somnolence*                                            | 7                                         | 17                     |
| Akathisia                                              | 3                                         | 13                     |
| Parkinsonism**                                         | 5                                         | 10                     |
| Dizziness                                              | 2                                         | 4                      |
| Dystonia***                                            | <1                                        | 4                      |
| <b>Psychiatric Disorders</b>                           |                                           |                        |
| Insomnia                                               | 8                                         | 10                     |
| Agitation                                              | 4                                         | 5                      |
| Anxiety                                                | 4                                         | 5                      |
| Restlessness                                           | 1                                         | 2                      |

Note: Figures rounded to the nearest integer  
\* Somnolence includes adverse event terms: hypersomnia, hypersomnolence, sedation, and somnolence  
\*\* Parkinsonism includes adverse event terms: bradykinesia, cogwheel rigidity, drooling, extrapyramidal disorder, hypokinesia, muscle rigidity, parkinsonism, psychomotor retardation, and tremor  
\*\*\* Dystonia includes adverse event terms: dystonia, oculogyric crisis, oromandibular dystonia, tongue spasm, torticollis, and trismus

#### Dose-Related Adverse Reactions

In pooled data from the short-term, placebo-controlled, fixed-dose studies, there were no dose-related adverse reactions (greater than 5% incidence) in patients treated with LATUDA across the 20 mg/day to 160 mg/day dose range. However, the frequency of akathisia increased with dose up to 120 mg/day (5.6% LATUDA 20 mg, 10.7% LATUDA 40 mg, 12.3% LATUDA 80 mg, 22.0% LATUDA 120 mg); akathisia was reported by 7.4% (9/121) of patients receiving 160 mg/day. Akathisia occurred in 3.0% of subjects receiving placebo.

#### Extrapyramidal Symptoms

In the short-term, placebo-controlled schizophrenia studies, for LATUDA-treated patients, the incidence of reported events related to extrapyramidal symptoms (EPS), excluding akathisia and restlessness, was 13.5% versus 5.8% for placebo-treated patients. The incidence of akathisia for LATUDA-treated patients was 12.9% versus 3.0% for placebo-treated patients. Incidence of EPS by dose is provided in Table 7.

**Table 6: Incidence of EPS Compared to Placebo**

| Adverse Event Term                                      | LATUDA                    |                            |                             |                             |                              |                              |
|---------------------------------------------------------|---------------------------|----------------------------|-----------------------------|-----------------------------|------------------------------|------------------------------|
|                                                         | Placebo<br>(N=709)<br>(%) | 20 mg/day<br>(N=71)<br>(%) | 40 mg/day<br>(N=487)<br>(%) | 80 mg/day<br>(N=538)<br>(%) | 120 mg/day<br>(N=291)<br>(%) | 160 mg/day<br>(N=121)<br>(%) |
| <b>All EPS events</b>                                   | <b>9</b>                  | <b>10</b>                  | <b>21</b>                   | <b>23</b>                   | <b>39</b>                    | <b>20</b>                    |
| <b>All EPS events, excluding Akathisia/Restlessness</b> | <b>6</b>                  | <b>6</b>                   | <b>11</b>                   | <b>12</b>                   | <b>22</b>                    | <b>13</b>                    |
| Akathisia                                               | 3                         | 6                          | 11                          | 12                          | 22                           | 7                            |
| Dystonia*                                               | <1                        | 0                          | 4                           | 5                           | 7                            | 2                            |
| Parkinsonism**                                          | 5                         | 6                          | 9                           | 8                           | 17                           | 11                           |
| Restlessness                                            | 1                         | 1                          | 3                           | 1                           | 3                            | 2                            |

Note: Figures rounded to the nearest integer  
\* Dystonia includes adverse event terms: dystonia, oculogyric crisis, oromandibular dystonia, tongue spasm, torticollis, and trismus  
\*\* Parkinsonism includes adverse event terms: bradykinesia, cogwheel rigidity, drooling, extrapyramidal disorder, hypokinesia, muscle rigidity, parkinsonism, psychomotor retardation, and tremor

In the short-term, placebo-controlled schizophrenia studies, data was objectively collected on the Simpson Angus Rating Scale for extrapyramidal symptoms (EPS), the Barnes Akathisia Scale (for akathisia) and the Abnormal Involuntary Movement Scale (for dyskinesias). The mean change from baseline for LATUDA-treated patients was comparable to placebo-treated patients, with the exception of the Barnes Akathisia Scale global score (LATUDA, 0.1; placebo, 0.0). The percentage of patients who shifted from normal to abnormal was greater in LATUDA-treated patients versus placebo for the BAS (LATUDA, 14.4%; placebo, 7.1%) and the SAS (LATUDA, 5.0%; placebo, 2.3%).

## Dystonia

**Class Effect:** Symptoms of dystonia, prolonged abnormal contractions of muscle groups, may occur in susceptible individuals during the first few days of treatment. Dystonic symptoms include: spasm of the neck muscles, sometimes progressing to tightness of the throat, swallowing difficulty, difficulty breathing, and/or protrusion of the tongue. While these symptoms can occur at low doses, they occur more frequently and with greater severity with high potency and at higher doses of first-generation antipsychotic drugs. An elevated risk of acute dystonia is observed in males and younger age groups.

In the short-term, placebo-controlled clinical trials, dystonia occurred in 4.2% of LATUDA-treated subjects (0.0% LATUDA 20 mg, 3.5% LATUDA 40 mg, 4.5% LATUDA 80 mg, 6.5% LATUDA 120 mg and 2.5% LATUDA 160 mg) compared to 0.8% of subjects receiving placebo. Seven subjects (0.5%, 7/1508) discontinued clinical trials due to dystonic events – four were receiving LATUDA 80 mg/day and three were receiving LATUDA 120 mg/day.

**Other Adverse Reactions Observed During the Premarketing Evaluation of LATUDA**  
Following is a list of adverse reactions reported by patients treated with LATUDA at multiple doses of  $\geq 20$  mg once daily during any phase of a study within the database of 2905 patients. The reactions listed are those that could be of clinical importance, as well as reactions that are plausibly drug-related on pharmacologic or other grounds. Reactions listed in Table 5 or those that appear elsewhere in the LATUDA label are not included. Although the reactions reported occurred during treatment with LATUDA, they were not necessarily caused by it.

Reactions are further categorized by organ class and listed in order of decreasing frequency according to the following definitions: those occurring in at least 1/100 patients (frequent) (only those not already listed in the tabulated results from placebo-controlled studies appear in this listing); those occurring in 1/100 to 1/1000 patients (infrequent); and those occurring in fewer than 1/1000 patients (rare).

**Blood and Lymphatic System Disorders: Infrequent:** anemia

**Cardiac Disorders: Frequent:** tachycardia; **Infrequent:** AV block 1st degree, angina pectoris, bradycardia

**Ear and Labyrinth Disorders: Infrequent:** vertigo

**Eye Disorders: Frequent:** blurred vision

**Gastrointestinal Disorders: Frequent:** abdominal pain, diarrhea; **Infrequent:** gastritis

**General Disorders and Administrative Site Conditions: Rare:** sudden death

**Investigations: Frequent:** CPK increased

**Metabolism and Nutritional System Disorders: Frequent:** decreased appetite

**Musculoskeletal and Connective Tissue Disorders: Rare:** rhabdomyolysis

**Nervous System Disorders: Infrequent:** cerebrovascular accident, dysarthria

**Psychiatric Disorders: Infrequent:** abnormal dreams, panic attack, sleep disorder;

**Renal and Urinary Disorders: Infrequent:** dysuria; **Rare:** renal failure

**Reproductive System and Breast Disorders: Infrequent:** amenorrhea, dysmenorrhea; **Rare:** breast enlargement, breast pain, galactorrhea, erectile dysfunction

**Skin and Subcutaneous Tissue Disorders: Frequent:** rash, pruritus; **Rare:** angioedema

**Vascular Disorders: Frequent:** hypertension

## 7 DRUG INTERACTIONS

### 7.1 Potential for Other Drugs to Affect LATUDA

LATUDA is predominantly metabolized by CYP3A4. LATUDA should not be used in combination with strong inhibitors or inducers of this enzyme [see **Contraindications (4)**] and dose should be limited when used in combination with moderate inhibitors of CYP3A4 [see **Dosage and Administration (2.4)**]. No dose adjustment is needed with concomitant use of lithium (see Figure 1).

**Figure 1: Impact of Other Drugs on LATUDA Pharmacokinetics**

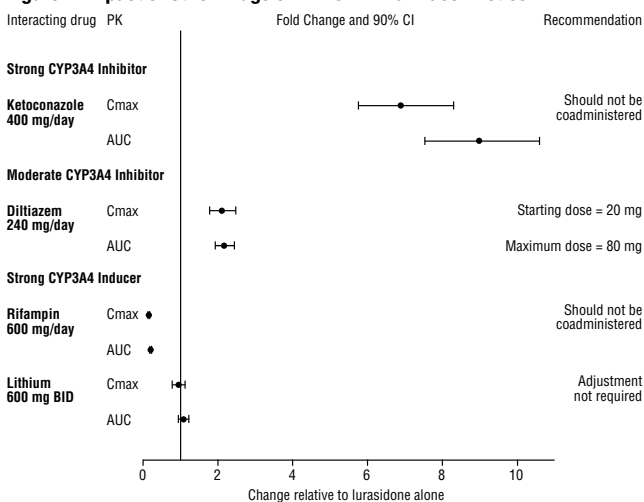

### 7.2 Potential for LATUDA to Affect Other Drugs

No adjustment is needed on the dose of lithium, or substrates of P-gp or CYP3A4 when coadministered with LATUDA (Figure 2).

**Figure 2: Impact of LATUDA on Other Drugs**

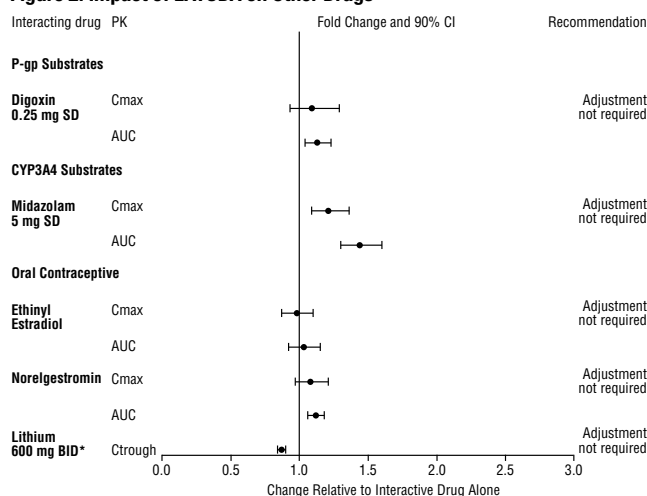

\*Steady state lithium Ctrough on Day 4 vs Day 8 when lithium was coadministered with lurasidone at steady state

## 8 USE IN SPECIFIC POPULATIONS

### 8.1 Pregnancy

#### Teratogenic Effects

Pregnancy Category B

LATUDA should be used during pregnancy only if the potential benefit justifies the potential risk to the fetus.

#### Non-teratogenic Effects

Neonates exposed to antipsychotic drugs during the third trimester of pregnancy are at risk for extrapyramidal and/or withdrawal symptoms following delivery. There have been reports of agitation, hypertonia, hypotonia, tremor, somnolence, respiratory distress and feeding disorder in these neonates. These complications have varied in severity; while in some cases symptoms have been self-limited, in other cases neonates have required intensive care unit support and prolonged hospitalization.

Safe use of LATUDA during pregnancy or lactation has not been established; therefore, use of LATUDA in pregnancy, in nursing mothers, or in women of childbearing potential requires that the benefits of treatment be weighed against the possible risks to mother and child.

#### Animal Data

No adverse developmental effects were seen in a study in which pregnant rats were given LATUDA during the period of organogenesis and continuing through weaning at doses up to 10 mg/kg/day; this dose is approximately half of the MRHD based on body surface area.

No teratogenic effects were seen in studies in which pregnant rats and rabbits were given LATUDA during the period of organogenesis at doses up to 25 and 50 mg/kg/day, respectively. These doses are 1.5- and 6- times, in rats and rabbits respectively, the maximum recommended human dose (MRHD) of 160 mg/day based on body surface area.

### 8.3 Nursing Mothers

LATUDA was excreted in milk of rats during lactation. It is not known whether LATUDA or its metabolites are excreted in human milk. Because of the potential for serious adverse reactions in nursing infants, a decision should be made whether to discontinue nursing or to discontinue the drug, considering risk of drug discontinuation to the mother.

### 8.4 Pediatric Use

Safety and effectiveness in pediatric patients have not been established.

### 8.5 Geriatric Use

Clinical studies of LATUDA in the treatment of schizophrenia did not include sufficient numbers of patients aged 65 and older to determine whether or not they respond differently from younger patients. In elderly patients with psychosis (65 to 85), LATUDA concentrations (20 mg/day) were similar to those in young subjects [see **Clinical Pharmacology (12.3)**]. No dose adjustment is necessary in elderly patients (Figure 2).

Elderly patients with dementia-related psychosis treated with LATUDA are at an increased risk of death compared to placebo. LATUDA is not approved for the treatment of patients with dementia-related psychosis [see **Boxed Warning**].

### 8.6 Other Patient Factors

The effect of intrinsic patient factors on the pharmacokinetics of LATUDA is presented in Figure 3.



**Figure 3: Impact of Other Patient Factors on LATUDA Pharmacokinetics**

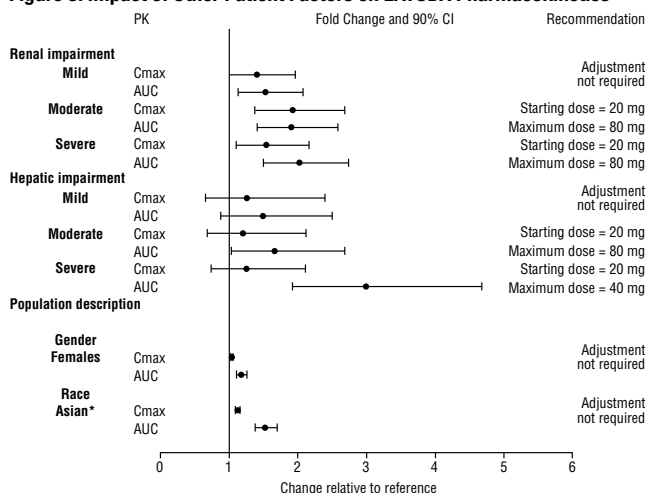

\*Compare to Caucasian

## 10 OVERDOSAGE

### 10.1 Human Experience

In premarketing clinical studies involving 2905 patients, accidental or intentional overdosage of LATUDA was identified in one patient who ingested an estimated 560 mg of LATUDA. This patient recovered without sequelae. This patient resumed LATUDA treatment for an additional two months.

### 10.2 Management of Overdosage

Consult a Certified Poison Control Center for up-to-date guidance and advice. There is no specific antidote to LATUDA, therefore, appropriate supportive measures should be instituted and close medical supervision and monitoring should continue until the patient recovers.

Cardiovascular monitoring should commence immediately, including continuous electrocardiographic monitoring for possible arrhythmias. If antiarrhythmic therapy is administered, disopyramide, procainamide, and quinidine carry a theoretical hazard of additive QT-prolonging effects when administered in patients with an acute overdose of LATUDA. Similarly, the alpha-blocking properties of bretylium might be additive to those of LATUDA, resulting in problematic hypotension.

Hypotension and circulatory collapse should be treated with appropriate measures. Epinephrine and dopamine should not be used, or other sympathomimetics with beta-agonist activity, since beta stimulation may worsen hypotension in the setting of LATUDA-induced alpha blockade. In case of severe extrapyramidal symptoms, anticholinergic medication should be administered.

Gastric lavage (after intubation if patient is unconscious) and administration of activated charcoal together with a laxative should be considered.

The possibility of obtundation, seizures, or dystonic reaction of the head and neck following overdose may create a risk of aspiration with induced emesis.

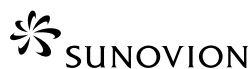

Manufactured for:  
Sunovion Pharmaceuticals Inc.  
Marlborough, MA 01752 USA

For Customer Service, call 1-888-394-7377.  
For Medical Information, call 1-800-739-0565.  
To report suspected adverse reactions, call 1-877-737-7226.

901456R0X

LATUDA is a registered trademark of Dainippon Sumitomo Pharma Co. Ltd.  
Sunovion Pharmaceuticals Inc. is a U.S. subsidiary of Dainippon Sumitomo  
Pharma Co. Ltd.

© 2012 Sunovion Pharmaceuticals Inc.

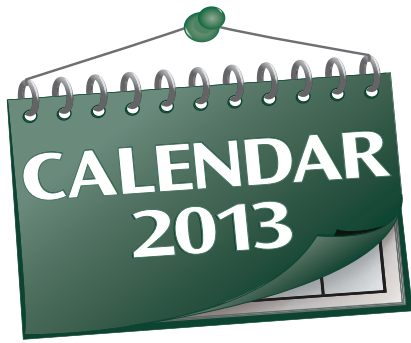

*For free listing of your organization's official annual or regional meeting, please send us the following information: sponsor, location, inclusive dates, type and number of continuing education credits (if available), and the name, address, and telephone number of the person or group to contact for more information. In order for an event to appear in our listing, all notices and changes must be received at least 6 months in advance of the meeting and should be addressed to:*

**Calendar, American Journal of Psychiatry, 1000 Wilson Boulevard, Suite 1825, Arlington, VA 22209-3901, [swestrate@psych.org](mailto:swestrate@psych.org) (e-mail).**

*Because of space limitations, only listings of meetings of the greatest interest to Journal readers may be included.*

---

## DECEMBER 2012

**December 6–9**, 23rd Annual Meeting and Symposium, American Academy of Addiction Psychiatry, Turnberry Isle Hotel Miami, Aventura, Florida. Contact: Isabel Vieira, 400 Massasoit Ave, Suite 307 (2nd floor), East Providence, RI 02914; (401) 524-3076 (tel); [www.aaap.org/meetings-and-events](http://www.aaap.org/meetings-and-events) (web site).

---

## FEBRUARY

**February 13-17**, 18th Annual Psychopharmacology Update, Nevada

Psychiatric Association (district branch of APA), Paris Las Vegas Hotel, Las Vegas, NV. Contact: (877) 493-0007 (tel); [conference@nvpsychiatry.org](mailto:conference@nvpsychiatry.org) (email); [www.nvpsychiatry.org](http://www.nvpsychiatry.org) (web site).

---

## MAY

**May 18–22**, 166th Annual Meeting, American Psychiatric Association, San Francisco, Calif. Contact: APA Annual Meetings Dept., 1000 Wilson Blvd, Suite 1825, Arlington, VA 22209; (703) 907-7815 (tel); <http://www.psych.org/learn/annual-meeting> (web site).

---

## JUNE

**June 6–9**, 4th World Congress on ADHD: From Childhood to Adult Disease, Milan, Italy. Contact Congress Organizer, +49-40-670 88 20 (tel); [adhd2013@cpo-hanser.de](mailto:adhd2013@cpo-hanser.de) (email); [www.adhd-congress.org](http://www.adhd-congress.org) (web site).

---

## JULY

**July 8–13**, 28th International Congress of Applied Psychology, Palais des Congrès de Paris, France. Contact [exh@icap2014.com](mailto:exh@icap2014.com) (email); [www.icap2014.com](http://www.icap2014.com) (web site).

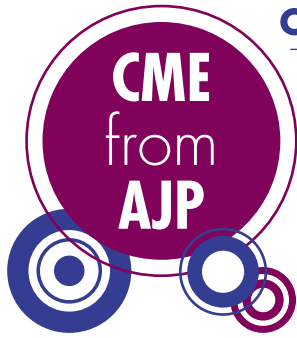

## Continuing Medical Education

Three articles in this issue form the basis of a short course with questions that can be answered for up to 1 *AMA PRA Category 1 Credit™* each by visiting <http://psychiatryonline.org/cme.aspx> and clicking on the “American Journal of Psychiatry” tab.

CME credit is issued only online, and a paid subscription to the AJP CME course program is required.

This month's courses appear on pages 1333–1336.

FREE AUDIO!

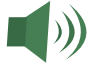

## Have You Heard?

You can listen to highlights of The American Journal of Psychiatry by downloading a monthly free .mp3 audio file from our web site (<http://ajp.psychiatryonline.org/audio.aspx#>) or by subscribing to the AJP Audio podcast at iTunes or other feed reader. Presented by Deputy Editor Dr. Susan Schultz or by Executive Editor Michael Roy, each month's audio lasts approximately 30 minutes and covers several research articles, the Treatment in Psychiatry feature, and one or two editorials.

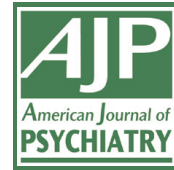

Coming in the January 2013 issue\*

## THE AMERICAN JOURNAL OF PSYCHIATRY

### DSM-5 Field Trials in the United States and Canada, Part I: Study Design, Sampling Strategy, Implementation, and Analytic Approach

D.E. Clarke, W.E. Narrow, D.A. Regier, S.J. Kuramoto, D.J. Kupfer, E.A. Kuhl, L. Greiner, and H.C. Kraemer

### DSM-5 Field Trials in the United States and Canada, Part II: Test-Retest Reliability of Selected Categorical Diagnoses

D.A. Regier, W.E. Narrow, D.E. Clarke, H.C. Kraemer, S.J. Kuramoto, E.A. Kuhl, and D.J. Kupfer

### DSM-5 Field Trials in the United States and Canada, Part III: Development and Reliability Testing of a Cross-Cutting Symptom Assessment for DSM-5

W.E. Narrow, D.E. Clarke, S.J. Kuramoto, H.C. Kraemer, D.J. Kupfer, L. Greiner, and D.A. Regier

### Effect of a Paraprofessional Home-Visiting Intervention on American Indian Teen Mothers' and Infants' Behavioral Risks: A Randomized Controlled Trial

A. Barlow, B. Mullany, S. Compton, A. Carter, R. Hastings, T. Billy, V. Coho-Mescal, S. Lorenzo, and J.T. Walkup

\*Can't wait? Visit [ajp.psychiatryonline.org/AJPInAdvance.aspx](http://ajp.psychiatryonline.org/AJPInAdvance.aspx) to see all articles uploaded in advance of print!

# The first extended-release methylphenidate oral suspension for ADHD treatment

Now FDA Approved

Available January 2013

For more information, visit [www.QuillivantXRPro.com](http://www.QuillivantXRPro.com) or call 1-800-206-8115

## INDICATION

Quillivant XR is a central nervous system (CNS) stimulant indicated for the treatment of Attention Deficit Hyperactivity Disorder (ADHD). The efficacy of Quillivant XR was established in a 2-week, placebo-controlled trial in children aged 6 to 12 years with a diagnosis of ADHD. Accumulated efficacy data from other methylphenidate products were also considered.

## IMPORTANT SAFETY INFORMATION

**WARNING: ABUSE AND DEPENDENCE**  
**CNS stimulants, including Quillivant XR, other methylphenidate-containing products, and amphetamines, have a high potential for abuse and dependence. Assess the risk of abuse prior to prescribing, and monitor for signs of abuse and dependence while on therapy.**

- Quillivant XR is contraindicated in patients with known hypersensitivity to methylphenidate or product components, and in patients who are taking concurrent treatment with a monoamine oxidase inhibitor (MAOI), or have used an MAOI within the preceding 14 days
- Sudden death has been reported in association with CNS stimulants at recommended doses in children and adolescents with structural cardiac abnormalities or other serious heart problems. In adults, sudden death, stroke, and myocardial infarction have been reported. Avoid use in patients with known structural cardiac abnormalities, cardiomyopathy, serious heart arrhythmias, or coronary artery disease

- Monitor blood pressure and pulse. Consider the benefits and risks in patients for whom an increase in blood pressure or heart rate would be problematic
- Use of stimulants may cause psychotic or manic symptoms in patients with no prior history, or exacerbation of symptoms in patients with pre-existing psychiatric illness. Evaluate for bipolar disorder prior to Quillivant XR use
- Monitor height and weight at appropriate intervals in pediatric patients for long-term suppression of growth
- Based on accumulated data from other methylphenidate products, the most common adverse reactions are appetite decreased, insomnia, nausea, vomiting, dyspepsia, abdominal pain, weight decreased, anxiety, dizziness, irritability, affect lability, tachycardia, and blood pressure increased
- Based on animal data, use of Quillivant XR during pregnancy may cause fetal harm. Nursing mothers should be advised to discontinue drug or discontinue nursing, taking into consideration the importance of the drug to the mother

*Please see Brief Summary of Prescribing Information, including **BOXED WARNING** regarding Abuse and Dependence, on following page.*

Quillivant XR™ (methylphenidate HCl) for extended-release oral suspension, CII Rx only  
**BRIEF SUMMARY:** Consult Full Prescribing Information for Complete Product Information.

**WARNING: ABUSE AND DEPENDENCE**

**CNS stimulants, including Quillivant XR, other methylphenidate-containing products, and amphetamines, have a high potential for abuse and dependence. Assess the risk of abuse prior to prescribing, and monitor for signs of abuse and dependence while on therapy [see Warnings and Precautions, Drug Abuse and Dependence].**

**INDICATIONS AND USAGE**

Quillivant XR is indicated for the treatment of Attention Deficit Hyperactivity Disorder (ADHD). The efficacy of Quillivant XR was established in a 2-week, placebo-controlled, laboratory classroom, crossover study in children aged 6-12 years with a diagnosis of ADHD. Patients in the trial met DSM-IV-TR® criteria for ADHD. Accumulated efficacy data from other methylphenidate products were also considered.

**CONTRAINDICATIONS**

**Hypersensitivity to Methylphenidate or other Components of Quillivant XR.**

Quillivant XR is contraindicated in patients known to be hypersensitive to methylphenidate, or other components of Quillivant XR. Hypersensitivity reactions such as angioedema and anaphylactic reactions have been reported in patients treated with other methylphenidate products.

**Monoamine Oxidase Inhibitors** Quillivant XR is contraindicated during treatment with monoamine oxidase inhibitors, and also within 14 days following discontinuation of treatment with a monoamine oxidase inhibitor (MAOI), because of the risk of hypertensive crisis.

**WARNINGS AND PRECAUTIONS**

**Potential for Abuse and Dependence** CNS stimulants, including Quillivant XR, other methylphenidate-containing products, and amphetamines, have a high potential for abuse and dependence. Assess the risk of abuse prior to prescribing, and monitor for signs of abuse and dependence while on therapy [see Drug Abuse and Dependence].

**Serious Cardiovascular Reactions** Stroke and myocardial infarction have occurred in adults treated with CNS stimulants at recommended doses. Sudden death has occurred in children and adolescents with structural cardiac abnormalities and other serious cardiac problems, and in adults taking CNS stimulants at recommended doses for ADHD. Avoid use in patients with known structural cardiac abnormalities, cardiomyopathy, serious cardiac arrhythmias, coronary artery disease, or other serious cardiac problems. Further evaluate patients who develop exertional chest pain, unexplained syncope, or arrhythmias during treatment with Quillivant XR.

**Blood Pressure and Heart Rate Increases** CNS stimulants cause an increase in blood pressure (mean increase approximately 2 to 4 mmHg) and heart rate (mean increase approximately 3 to 6 bpm). Individuals may have larger increases. Monitor all patients for hypertension and tachycardia.

**Psychiatric Adverse Reactions Exacerbation of Pre-Existing Psychosis** CNS stimulants may exacerbate symptoms of behavior disturbance and thought disorder in patients with a pre-existing psychotic disorder.

**Induction of a Manic Episode in Patients with Bipolar Disorder** CNS stimulants may induce a manic or mixed episode in patients. Prior to initiating treatment, screen patients for risk factors for developing a manic episode (e.g., comorbid or history of depressive symptoms or a family history of suicide, bipolar disorder, or depression).  
**New Psychotic or Manic Symptoms** CNS stimulants, at recommended doses, may cause psychotic or manic symptoms (e.g., hallucinations, delusional thinking, or mania) in patients without a prior history of psychotic illness or mania. If such symptoms occur, consider discontinuing Quillivant XR. In a pooled analysis of multiple short-term, placebo-controlled studies of CNS stimulants, psychotic or manic symptoms occurred in approximately 0.1% of CNS stimulant-treated patients, compared to 0 in placebo-treated patients.

**Long-Term Suppression of Growth** CNS stimulants have been associated with weight loss and slowing of growth rate in pediatric patients. Closely monitor growth (weight and height) in pediatric patients treated with CNS stimulants, including Quillivant XR. Careful follow-up of weight and height in children ages 7 to 10 years who were randomized to either methylphenidate or nonmedication treatment groups over 14 months, as well as in naturalistic subgroups of newly methylphenidate-treated and nonmedication-treated children over 36 months (to the ages of 10 to 13 years), suggests that consistently medicated children (i.e., treatment for 7 days per week throughout the year) have a temporary slowing in growth rate (on average, a total of about 2 cm less growth in height and 2.7 kg less growth in weight over 3 years), without evidence of growth rebound during this period of development. Published data are inadequate to determine whether chronic use of amphetamines may cause a similar suppression of growth; however, it is anticipated that they likely have this effect as well. Therefore, growth should be monitored during treatment with stimulants, and patients who are not growing or gaining height or weight as expected may need to have their treatment interrupted.

**ADVERSE REACTIONS**

**Clinical Trials Experience** Because clinical trials are conducted under widely varying conditions, adverse reaction rates observed in the clinical trials of a drug cannot be directly compared to rates in the clinical trials of another drug and may not reflect the rates observed in clinical practice. **Clinical Trials Experience with Other Methylphenidate Products in Children, Adolescents, and Adults with ADHD** Commonly reported ( $\geq 2\%$  of the methylphenidate group and at least twice the rate of the placebo group) adverse reactions from placebo-controlled trials of methylphenidate products include: appetite decreased, weight decreased, nausea, abdominal pain, dyspepsia, dry mouth,

vomiting, insomnia, anxiety, nervousness, restlessness, affect lability, agitation, irritability, dizziness, vertigo, tremor, blurred vision, blood pressure increased, heart rate increased, tachycardia, palpitations, hyperhidrosis, and pyrexia. **Clinical Trials Experience with Quillivant XR in Children and Adolescents with ADHD.** There is limited experience with Quillivant XR in controlled trials. Based on this limited experience, the adverse reaction profile of Quillivant XR appears similar to other methylphenidate extended-release products. The most common ( $\geq 2\%$  in the Quillivant XR group and greater than placebo) adverse reactions reported in the Phase 3 controlled study conducted in 45 ADHD patients (ages 6-12 years) were affect lability, excoriation, initial insomnia, tic, decreased appetite, vomiting, motion sickness, eye pain, and rash.

**Table 2. Common Adverse Reactions occurring in  $\geq 2\%$  of subjects on Quillivant XR and greater than placebo during the controlled cross-over phase**

| Adverse reaction   | Quillivant XR (N=45) | Placebo (N=45) |
|--------------------|----------------------|----------------|
| Affect lability    | 9%                   | 2%             |
| Excoriation        | 4%                   | 0%             |
| Initial Insomnia   | 2%                   | 0%             |
| Tic                | 2%                   | 0%             |
| Decreased appetite | 2%                   | 0%             |
| Vomiting           | 2%                   | 0%             |
| Motion sickness    | 2%                   | 0%             |
| Eye pain           | 2%                   | 0%             |
| Rash               | 2%                   | 0%             |

**Postmarketing Experience** The following adverse reactions have been identified during post approval use of methylphenidate products. Because these reactions are reported voluntarily from a population of uncertain size, it is not possible to reliably estimate their frequency or establish a causal relationship to drug exposure. These adverse reactions are as follows:

**Blood and Lymphatic System Disorders:** Pancytopenia, Thrombocytopenia, Thrombocytopenic purpura

**Cardiac Disorders:** Angina pectoris, Bradycardia, Extrasystole, Supraventricular tachycardia, Ventricular extrasystole

**Eye Disorders:** Diplopia, Mydriasis, Visual impairment

**General Disorders:** Chest pain, Chest discomfort, Hyperpyrexia

**Immune System Disorders:** Hypersensitivity reactions such as Angioedema, Anaphylactic reactions, Aricular swelling, Bullous conditions, Exfoliative conditions, Urticarias, Pruritus NEC, Rashes, Eruptions, and Exanthemas NEC

**Investigations:** Alkaline phosphatase increased, Bilirubin increased, Hepatic enzyme increased, Platelet count decreased, White blood cell count abnormal

**Musculoskeletal, Connective Tissue and Bone Disorders:** Arthralgia, Myalgia, Muscle twitching

**Nervous System Disorders:** Convulsion, Grand mal convulsion, Dyskinesia

**Psychiatric Disorders:** Disorientation, Hallucination, Hallucination auditory, Hallucination visual, Mania

**Urogenital System:** Priapism

**Skin and Subcutaneous Tissue Disorders:** Alopecia, Erythema

**Vascular Disorders:** Raynaud's phenomenon

**DRUG INTERACTIONS**

**MAO Inhibitors** Do not administer Quillivant XR concomitantly with monoamine oxidase inhibitors or within 14 days after discontinuing MAOI treatment. Concomitant use of MAOIs and CNS stimulants can cause hypertensive crisis. Potential outcomes include death, stroke, myocardial infarction, aortic dissection, ophthalmological complications, eclampsia, pulmonary edema, and renal failure.

**USE IN SPECIFIC POPULATIONS**

**Pregnancy** Pregnancy Category C **Risk Summary** There are no adequate or well-controlled studies with Quillivant XR in pregnant women. Adverse pregnancy outcomes, including premature delivery and low birth weight, have been seen in mothers dependent on other stimulant products such as amphetamines. Methylphenidate showed some potential for teratogenicity when pregnant animals were treated during organogenesis: an increased incidence of fetal spina bifida in rabbits at 40 times the maximum recommended human dose (MRHD), on a mg/m<sup>2</sup> basis, and an increased incidence of fetal skeletal variations in rats at 7 times the MRHD. A decrease in body weight gain was seen in the offspring of rats treated with methylphenidate throughout pregnancy and lactation at 4 times the MRHD. Quillivant XR should be used during pregnancy only if the potential benefit justifies the potential risk to the fetus. **Clinical Considerations** Stimulant medications, such as Quillivant XR, cause vasoconstriction and thereby decrease placental perfusion. Infants born to amphetamine dependent mothers have an increased risk of premature delivery and low birth weight. Monitor infants for symptoms of withdrawal such as feeding difficulties, irritability, agitation, and excessive drowsiness. **Animal Data** In studies conducted in rats and rabbits, methylphenidate was administered orally at doses of up to 75 and 200 mg/kg/day, respectively, during the period of organogenesis. Teratogenic effects (increased incidence of fetal spina bifida) were observed in rabbits at the highest dose, which is approximately 40 times the maximum recommended human dose (MRHD) on a mg/m<sup>2</sup> basis. The no effect level for embryo-fetal development in rabbits was 60 mg/kg/day (11 times the MRHD on a mg/m<sup>2</sup> basis). There was no evidence of specific teratogenic activity in rats, although increased incidences of fetal skeletal variations were seen at the highest dose level (7 times the MRHD on a mg/m<sup>2</sup> basis), which was also maternally toxic. The no effect level for embryo-fetal development in rats was 25 mg/kg/day (2 times the MRHD on a mg/m<sup>2</sup> basis). When methylphenidate was administered to rats throughout pregnancy and lactation at doses of up to 45 mg/kg/day, offspring body weight gain was decreased at the highest dose (4 times the MRHD on a mg/m<sup>2</sup> basis), but no other effects on postnatal

Quillivant XR™ (methylphenidate HCl) Brief Summary continued...

development were observed. The no effect level for pre- and postnatal development in rats was 15 mg/kg/day (equal to the MRHD on a mg/m<sup>2</sup> basis). **Nursing Mothers** Methylphenidate is present in human milk. Long-term neurodevelopmental effects on infants from stimulant exposure are unknown. Because of the potential for serious adverse reactions in nursing infants, a decision should be made whether to discontinue nursing or to discontinue the drug, taking into account the importance of the drug to the mother. **Pediatric Use** The safety and effectiveness of Quillivant XR have been established in pediatric patients ages 6 to 17 years. Use of Quillivant XR in pediatric patients 6 to 12 years of age is supported by adequate and well-controlled studies. Use in 12 to 17 year olds is supported by the adequate and well-controlled studies of Quillivant XR in younger pediatric patients and additional pharmacokinetic data in adolescents, along with safety information from other methylphenidate-containing products. The long-term efficacy of methylphenidate in pediatric patients has not been established. Safety and efficacy in pediatric patients below the age of 6 years have not been established. **Long Term Suppression of Growth** Growth should be monitored during treatment with stimulants, including Quillivant XR. Children who are not growing or gaining weight as expected may need to have their treatment interrupted [see *Warnings and Precautions*]. **Juvenile Animal Data** Rats treated with methylphenidate early in the postnatal period through sexual maturation demonstrated a decrease in spontaneous locomotor activity in adulthood. A deficit in acquisition of a specific learning task was observed in females only. The doses at which these findings were observed are at least 6 times the maximum recommended human dose (MRHD) on a mg/m<sup>2</sup> basis. In the study conducted in young rats, methylphenidate was administered orally at doses of up to 100 mg/kg/day for 9 weeks, starting early in the postnatal period (postnatal day 7) and continuing through sexual maturity (postnatal week 10). When these animals were tested as adults (postnatal weeks 13-14), decreased spontaneous locomotor activity was observed in males and females previously treated with 50 mg/kg/day (approximately 6 times the maximum recommended human dose [MRHD] on a mg/m<sup>2</sup> basis) or greater, and a deficit in the acquisition of a specific learning task was observed in females exposed to the highest dose (12 times the MRHD on a mg/m<sup>2</sup> basis). The no effect level for juvenile neurobehavioral development in rats was 5 mg/kg/day (half the MRHD on a mg/m<sup>2</sup> basis). The clinical significance of the long-term behavioral effects observed in rats is unknown. **Geriatric Use** Quillivant XR has not been studied in patients over the age of 65 years.

#### DRUG ABUSE AND DEPENDENCE

**Controlled Substance** Quillivant XR contains methylphenidate, a Schedule II controlled substance.

**Abuse** Signs and symptoms of CNS stimulant abuse include increased heart rate,

respiratory rate, blood pressure, and/or sweating, dilated pupils, hyperactivity, restlessness, insomnia, decreased appetite, loss of coordination, tremors, flushed skin, vomiting, and/or abdominal pain. Anxiety, psychosis, hostility, aggression, suicidal or homicidal ideation have also been observed. Abusers of CNS stimulants may chew, snort, inject, or use other unapproved routes of administration which can result in overdose and death [see *Overdosage*]. To reduce the abuse of CNS stimulants including Quillivant XR, assess the risk of abuse prior to prescribing. After prescribing, keep careful prescription records, educate patients and their families about abuse and on proper storage and disposal of CNS stimulants, monitor for signs of abuse while on therapy, and re-evaluate the need for Quillivant XR use.

**Dependence Tolerance** Tolerance (a state of adaptation in which exposure to a drug results in a reduction of the drug's desired and/or undesired effects over time) can occur during chronic therapy with CNS stimulants including Quillivant XR. **Dependence** Physical dependence (a state of adaptation manifested by a withdrawal syndrome produced by abrupt cessation, rapid dose reduction, or administration of an antagonist) can occur in patients treated with CNS stimulants including Quillivant XR. **Withdrawal symptoms** after abrupt cessation following prolonged high-dosage administration of CNS stimulants include extreme fatigue and depression.

#### OVERDOSAGE

**Signs and Symptoms** Signs and symptoms of acute methylphenidate overdose, resulting principally from overstimulation of the CNS and from excessive sympathomimetic effects, may include the following: nausea, vomiting, diarrhea, restlessness, anxiety, agitation, tremors, hyperreflexia, muscle twitching, convulsions (may be followed by coma), euphoria, confusion, hallucinations, delirium, sweating, flushing, headache, hyperpyrexia, tachycardia, palpitations, cardiac arrhythmias, hypertension, hypotension, tachypnea, mydriasis, and dryness of mucous membranes.

**Management of Overdose** Consult with a Certified Poison Control Center for up-to-date guidance and advice on the management of overdose with methylphenidate (1-800-222-1222.) Provide supportive care, including close medical supervision and monitoring. Treatment should consist of those general measures employed in the management of overdose with any drug. Consider the possibility of multiple drug overdose. Ensure an adequate airway, oxygenation, and ventilation. Monitor cardiac rhythm and vital signs. Use supportive and symptomatic measures.

**Next Wave™**  
PHARMACEUTICALS

© 2012 NextWave Pharmaceuticals, Inc. Cupertino, CA QUL486905

Quillivant XR is a trademark of NextWave Pharmaceuticals, Inc. All rights reserved.

**NOW  
AVAILABLE**  
— FOR —  
**PRE-ORDER**

from

**MHS**

Now Available

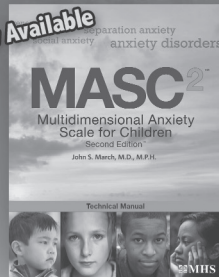

#### UnMASC the Many Faces of Anxiety

The Multidimensional Anxiety Scale for Children 2nd Edition™ (MASC 2™) assesses the presence of symptoms related to anxiety disorders in youth aged 8 to 19 years.

- Aids in the early identification, diagnosis, treatment planning and monitoring of anxiety-prone youth
- Assesses a broad range of emotional, physical, cognitive, and behavioral symptoms
- Generalized Anxiety Disorder (GAD) Index differentiates children with the disorder from the general population

[www.mhs.com/MASC2](http://www.mhs.com/MASC2)

CALL 2012

**CEFI** Comprehensive Executive Function Inventory

Jack A. Naglieri, Ph.D. & Sam Goldstein, Ph.D.

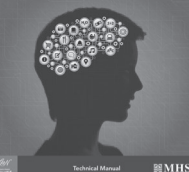

Pre-Order Today!

G&N  
Goldstein & Naglieri

Available in SPANISH

The CEFI is a comprehensive evaluation of executive function strengths and weaknesses in youth aged 5 to 18 years.

Provides scores on:

- Attention • Emotion Regulation • Flexibility
- Inhibitory Control • Initiation • Organization
- Planning • Self-Monitoring • Working Memory

Normed on a sample of 3,500 youth who represent the U.S. population for:

- Race/Ethnicity • Gender • Age
- Geographic Region • Parental Education

[www.mhs.com/CEFI](http://www.mhs.com/CEFI)

#### \*FREE Book Offer!

Pre-order any CEFI Kit and receive a FREE book, value of \$40. Offer valid until December 31, 2012.

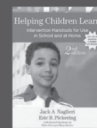

By Jack A. Naglieri, Ph.D. & Eric B. Fickering, Ph.D. with Spanish Handouts by Tallo Otero, Ph.D., & Mary Moreno, Ph.D.

Offers a fresh practical approach to teaching struggling students in the K-12 grades. Applying their expert knowledge of how children learn, the authors have incorporated a short questionnaire for school psychologists and 75 intervention handouts to assist teachers.

**Multi-Health Systems Inc.**

USA Tel: 1.800.456.3003 / CAN Tel: 1.800.268.6011

[www.mhs.com](http://www.mhs.com) • [customerservice@mhs.com](mailto:customerservice@mhs.com)

# The Residents' JOURNAL

The Residents' JOURNAL  
a publication of  
The American Journal of Psychiatry

October 2012      Volume 7      Issue 10

**Inside**

- 2 **Writer's Block**  
Monifa Seawell, M.D.
- 3 **Psychotherapy in the Medical Clinic**  
David Hsu, M.D.
- 4 **Prolonged QTc in a Hemodialysis Patient on Citalopram and Olanzapine for Bipolar Disorder**  
Kristopher Keith Klem, B.A.
- 6 **Prenatal and Postpartum Depression**  
Harita Raja, M.D.
- 8 **Facitious Acute Right Hemiplegia: Challenges of Treating Patients Without Universal Electronic Medical Records**  
Hector Diez-Caballero, M.D.  
Shirley Sostre-Oquendo, M.D.
- 10 **Management of Psychosis With Comorbid Prolactinoma**  
Neevon Esmaili, M.D.  
Daniel Newman, M.D.  
Dawn Ueda, M.D.
- 12 **Why Psychiatry Is a Branch of Medicine**  
David Hsu, M.D.
- 13 **Test Your Knowledge**
- 14 **Author Information and Upcoming Issue Themes**

**In This Issue**



This issue of the *Residents' Journal* highlights articles on the theme of psychosomatic medicine. In a commentary, David Hsu, M.D., describes his experiences in a dual residency program focusing on psychiatry and internal medicine. Kristopher Klem, B.A., presents a case report on prolonged QTc in a hemodialysis patient receiving antidepressant treatment for bipolar disorder. Harita Raja, M.D., discusses prenatal and postpartum depression and provides information on epidemiology, screening tools, and treatment. Lastly, Dr. Hsu contributes a book review of *Why Psychiatry Is a Branch of Medicine*.

|                                             |                                                                                            |
|---------------------------------------------|--------------------------------------------------------------------------------------------|
| Editor-in-Chief<br>Monifa Seawell, M.D.     | Guest Section Editor<br>David Hsu, M.D.                                                    |
| Senior Editor<br>Sarah M. Fayed, M.D.       | Editors Emeriti<br>Sarah B. Johnson, M.D.<br>Molly McVey, M.D.<br>Joseph M. Carimele, M.D. |
| Associate Editor<br>Arshya Vahabzadeh, M.D. | Staff Editor<br>Angela Moore                                                               |

The Residents' Journal accepts manuscripts authored by medical students, resident physicians, and fellows. To submit your paper, please visit the manuscript submission site at [mc.manuscriptcentral.com/appi-ajp](http://mc.manuscriptcentral.com/appi-ajp) and either create an account or use your existing account. For manuscript type, select "Residents." Then follow the instructions to upload your manuscript. Residents who are interested in participating as Guest Section Editors should e-mail the Residents' Journal Editor-in-Chief Monifa Seawell at [mseawell@med.wayne.edu](mailto:mseawell@med.wayne.edu).

See the September 2010 issue for details on the new peer review process.

The Residents' Journal is sent free-of-charge to all psychiatry residents. Anyone interested in being included on the distribution list should contact Angela Moore, the Residents' Journal staff editor at [ajp@psych.org](mailto:ajp@psych.org) with "Subscribe to Residents' Journal" in the subject line.

To access the complete Residents' Journal archives, visit [ajp.psychiatryonline.org/residents\\_journal.aspx](http://ajp.psychiatryonline.org/residents_journal.aspx)

# The American Journal of PSYCHIATRY

Latest  
IMPACT  
FACTOR  
12.539!

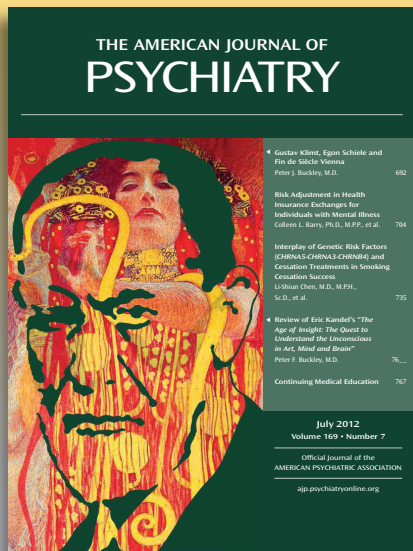

Official Journal of the  
American Psychiatric Association

Edited by Robert Freedman, M.D.

- The *American Journal of Psychiatry* has an Impact Factor of 12.539 according to the recently released 2011 Journal Citation Reports® (Thomson Reuters, 2012), placing it 2nd among the 129 journals in psychiatry while still remaining the far-and-away leader in total citations.

- The *American Journal of Psychiatry* (AJP) is also the #2 journal in psychiatry in terms of immediacy according to Thomson Scientific's Immediacy Index. This important performance metric is calculated by dividing the number of citations

to articles published in a given year by the number of articles published in that year.

- The Immediacy Index is a good measure of how quickly a given journal's articles are cited. AJP's #2 placement is a result of publishing articles that are relevant, covering current "hot" topics and cutting-edge research, and getting these findings to the field faster with AJP in Advance, the Journal's online-ahead-of-print publication protocol.

- A recent poll conducted by the BioMedical & Life Sciences Division of The Special Libraries Association identified the 100 most influential journals in all of Biology & Medicine over the last 100 years. *The American Journal of Psychiatry* was among those honored, the only psychiatry/psychology journal represented.

No other psychiatric journal reaches more psychiatrists with greater impact or immediacy than the one the overwhelming majority of psychiatrists considers essential: AJP.

ISSN 0002-953X • [ajp.psychiatryonline.org](http://ajp.psychiatryonline.org)

To order a subscription, visit [www.appi.org](http://www.appi.org).

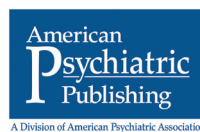

The *First* and *Last* Word in Psychiatry

[www.appi.org](http://www.appi.org) • 1-800-368-5777 • 703-907-7322

Find us on [facebook](#) and [twitter](#) Priority Code AH1246
