# THE AMERICAN JOURNAL OF PSYCHIATRY

## EDITOR-IN-CHIEF

Robert Freedman, M.D.

## DEPUTY EDITORS

David A. Lewis, M.D.

Robert Michels, M.D.

Daniel S. Pine, M.D.

Susan K. Schultz, M.D.

Carol A. Tamminga, M.D.

## EDITORIAL STAFF

### Executive Editor

Michael D. Roy

### Senior Editor/Features Writer

Jane Weaver, E.L.S.

### Senior Editor

John J. Guardiano, Ph.D.

### Production Manager

Susan Westrate

### Assistant Editors

Katie Duffy

Angela Moore

### Editorial Support Services

#### Manager

Nicole Gray

### Editorial Assistant

Linda LaCour

### Editorial Assistant/ Permissions Coordinator

Heidi Koch

### Assistants to the Editors

Lois Lilienthal

Laura English

Rachel Hogg

Russell A. Scholl

## ASSOCIATE EDITORS

Kathleen T. Brady, M.D., Ph.D.

David A. Brent, M.D.

Linda Brzustowicz, M.D.

Cameron S. Carter, M.D.

Steven Hamilton, M.D., Ph.D.

Daniel C. Javitt, M.D.

Bankole Johnson, M.D.

Ellen Leibenluft, M.D.

Douglas F. Levinson, M.D.

Jeffrey A. Lieberman, M.D.

Barbara Milrod, M.D.

Maria A. Oquendo, M.D.

Jerrold F. Rosenbaum, M.D.

A. John Rush, M.D.

Larry J. Siever, M.D.

Patricia Suppes, M.D., Ph.D.

## EDITOR EMERITA

Nancy C. Andreasen, M.D., Ph.D.

## FORMER EDITORS

Amariah Brigham, M.D.

1844-1849

T. Romeyn Beck, M.D.

1849-1854

John P. Gray, M.D.

1854-1886

G. Alder Blumer, M.D.

1886-1894

Richard Dewey, M.D.

1894-1897

Henry M. Hurd, M.D.

1897-1904

Edward N. Brush, M.D.

1904-1931

Clarence B. Farrar, M.D.

1931-1965

Francis J. Braceland, M.D.

1965-1978

John C. Nemiah, M.D.

1978-1993
